# Supplementary material for: Comprehensive genetic analysis of the human lipidome identifies novel loci controlling lipid homeostasis with links to coronary artery disease
Source: bioRxiv or medRxiv preprint supplement (doi:10.1101/2021.08.20.21261814), 2021-08-25
Supplement: Supplementary file [file media-2.pdf]

## Supplementary Information

### Table of Contents

|                          |                                                                                                   |    |
|--------------------------|---------------------------------------------------------------------------------------------------|----|
| Supplementary Note 1.    | <b>Associations between 737 lead SNPs with lipid species and metabolites in previous studies.</b> | 2  |
| Supplementary Note 2.    | <b>Regional association plots for lipid loci that colocalize with coronary artery disease.</b>    | 4  |
| Supplementary Note 3.    | <b>Comparison of estimated lipidomic effect sizes</b>                                             | 48 |
| Supplementary References |                                                                                                   | 49 |

**Supplementary Note 1: Associations between 737 lead SNPs with lipid species and metabolites in previous studies.** We identified 35 previous studies that had reported one or more of our 737 lead SNPs or a proxy ( $R^2 > 0.8$ ) (Supplementary Table 13); details below.

| Author or database | PMID or DOI                 | Sample size    | Method                           | # lipids/metabolites                               | Ethnicity                               | Reference |
|--------------------|-----------------------------|----------------|----------------------------------|----------------------------------------------------|-----------------------------------------|-----------|
| Burkhardt, R.      | 26401656                    | 2,107          | MS                               | 96 AA, AC                                          | Central European                        | 1         |
| Chai, J.F.         | 31628463                    | 1,954          | MS/MS                            | 136 AA, AC                                         | Chinese                                 | 2         |
| Chasman, D.I.      | 19936222                    | 17,296         | NMR                              | 17 lipoproteins                                    | European                                | 3         |
| Davis, J.          | 29084231                    | 8,372          | NMR                              | 68 lipid and lipoprotein subclasses                | Finnish                                 | 4         |
| Demirkan, A.       | 22359512                    | 4,034          | ESI-MS/MS                        | 153 lipids                                         | European                                | 5         |
| Draisma, H.        | 26068415                    | 7,478          | ESI-FIA-MS/MS                    | 129 metabolites                                    | European                                | 6         |
| Feofanova, E.      | 29610217                    | 1,552/1,872    | GC-MS, LC-MS                     | 102 circulating lipid-related metabolites          | European, African-American              | 7         |
| Gieger, C.         | 19043545                    | 284            | ESI-MS/MS                        | 363 metabolites                                    | Southern German                         | 8         |
| Harshfield, E.     | 10.1101/2020.10.16.20213520 | 5,662/13,814   | DI-HRMS                          | 360 lipids                                         | Pakistani, European                     | 9         |
| Hartiala, J.       | 26822151                    | 1,985/1,895    | ESI-MS/MS                        | plasma betaine levels                              | European                                | 10        |
| Hicks, A.A.        | 19798445                    | 4,400          | ESI-MS/MS                        | 33 sphingolipids, and 43 matched metabolite ratios | European                                | 11        |
| Hong, M.G.         | 23281178                    | 402/489        | UHPLC-MS                         | 6,138 unique molecular features                    | Swedish                                 | 12        |
| Hu, Y.             | 28298293                    | 3,521/12,020   | TLC-GC                           | Unclear number of Monounsaturated FA               | Chinese, European                       | 13        |
| Illig, T.          | 20037589                    | 1,809/422      | HPLC-ESI-MS/MS                   | 163 metabolic traits                               | European                                | 14        |
| Inouye, M.         | 22916037                    | 6,600          | NMR                              | 130 metabolite measures                            | European                                | 15        |
| Kalsbeek, A.       | 29652918                    | 2,400          | GC                               | 22 FA and 15 FA ratios                             | Framingham Heart Study Offspring Cohort | 16        |
| Kettunen, J.       | 22286219                    | 8,330          | NMR                              | 216 serum metabolic traits                         | Finnish                                 | 17        |
| Kettunen, J.       | 27005778                    | 24,925         | NMR                              | 123 metabolic traits                               | European                                | 18        |
| Krumsiek, J.       | 23093944                    | 1,768          | UHPLC-MS/MS, GC-MS/MS            | 486 metabolic traits (including 213 unknowns)      | German                                  | 19        |
| Long, T.           | 28263315                    | 1,960          | UHPLC-MS/MS                      | 644 metabolites                                    | European                                | 20        |
| Lotta, L.          | 27898682                    | 16,596         | MS/MS, GC-MS, UHPLC-MS/MS        | Branched-chain AA                                  | European                                | 21        |
| Lotta, L.          | 33414548                    | 8,569 - 86,507 | FIA-ESI-MS/MS, UHPLC-ESI-MS, NMR | 174 metabolites                                    | European                                | 22        |
| Mittelstrass, K.   | 21852955                    | 3,381          | HPLC-MS/MS                       | 131 metabolites                                    | South German                            | 23        |
| Nicholson, G.      | 21931564                    | 211            | NMR, FIA-ESI-MS/MS               | 526 metabolite peaks                               | European                                | 24        |
| Raffler, J.        | 26352407                    | 3,861/1,691    | NMR                              | 15,379 targeted and untargeted metabolic traits    | European                                | 25        |
| Rhee, E.           | 23823483                    | 2,076          | HPLC-ESI-MS/MS                   | 217 metabolites                                    | European                                | 26        |
| Shin, S.           | 24816252                    | 7,824          | HPLC-MS/MS, GC-MS/MS             | 486 metabolites (including 177 unknown)            | European                                | 27        |
| SNIPA              | 25431330                    | -              | -                                | -                                                  | Various                                 | 28        |

|               |          |             |                       |                 |                                     |    |
|---------------|----------|-------------|-----------------------|-----------------|-------------------------------------|----|
| Suhre, K.     | 21886157 | 1,768/1,052 | UHPLC-MS/MS, GC-MS/MS | 276 metabolites | European                            | 29 |
| Tabassum, R.  | 31551469 | 2,181       | DI-HRMS               | 141 lipids      | European                            | 30 |
| Teslovich, T. | 29481666 | 8,545       | NMR                   | 9 AA            | Finnish                             | 31 |
| Tukiainen, T. | 22156771 | 8,330       | NMR                   | 117 metabolites | Finnish                             | 32 |
| Xie, W.       | 23378610 | 957/341     | Unclear               | 14 metabolites  | European                            | 33 |
| Yet, I.       | 27073872 | 1,001       | MS                    | 605 metabolites | European                            | 34 |
| Yu, B.        | 27884205 | 1,872/1,552 | GC-MS, LC-MS          | 70 AA           | African American, European American | 35 |

Mass-spectrometry, MS; Tandem mass-spectrometry, MS/MS; High-resolution mass-spectrometry, HRMS; Nuclear magnetic resonance, NMR; Electrospray ionization, ESI; Gas chromatography, GC; (Ultra-)High performance liquid chromatography, (U)HPLC; Thin-layer chromatography, TLC; Flow-injection/infusion analysis, FIA; Direct infusion, DI; Amino acids, AA; Acyl-carnitines, AC; Fatty acids, FA;

**Supplementary Note 2: Regional association plots for lipid loci that colocalize with coronary artery disease.** We identified 47 putative shared causal variants from colocalization analysis of lipid loci (Supplementary Table 16). Shown is the regional association plot of coronary artery disease<sup>36</sup> and up to the top four lipid species that show evidence of colocalization ( $H3+H4 > 0.8$ ;  $H4/H3 > 10$ ). Regions were isolated from the 737 lead SNPs, with a window of 400 KB centred on the lead SNP. The indicated candidate SNP was the genetic variant with the largest posterior probability. Marker colours indicate linkage disequilibrium with the candidate SNP (obtained from the 1000 Genome European dataset). Colocalization sensitivity analysis was performed for the top colocalization, assessing the posterior probability of H0-H4 for different values of prior  $p_{12}$ . Shaded regions indicate the value of  $p_{12}$  which produces posterior probabilities of  $H3+H4 > 0.8$  and  $H4/H3 > 10$ .



CAD - Chr 1 (55305731-55705623)

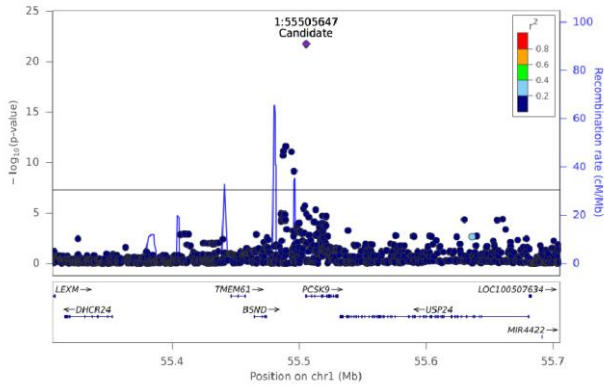

CE(20:2) - Chr 1 (55305731-55705623)

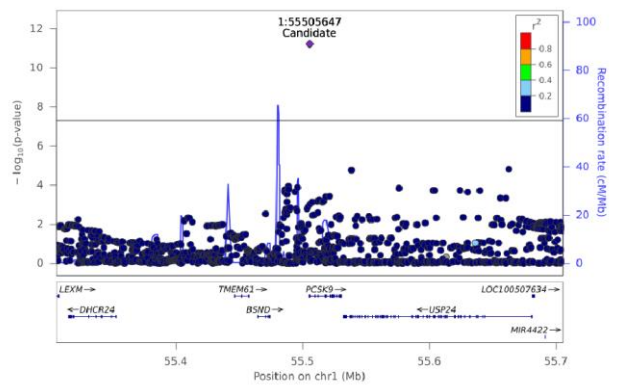

Total CE - Chr 1 (55305731-55705623)

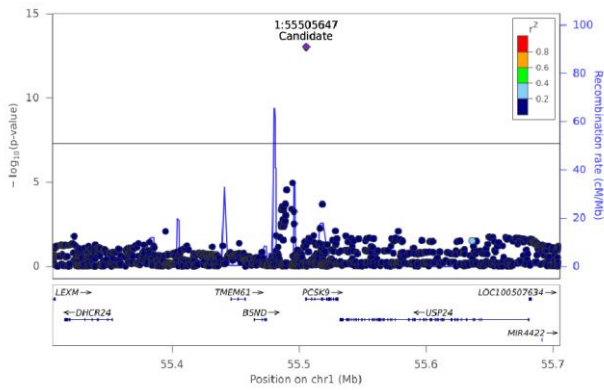

CE(16:0) - Chr 1 (55305731-55705623)

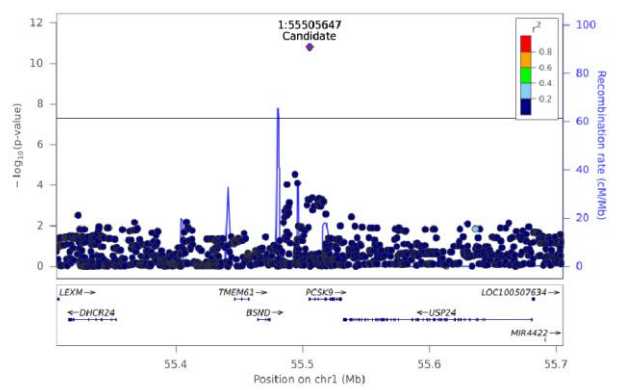

CE(18:1) - Chr 1 (55305731-55705623)

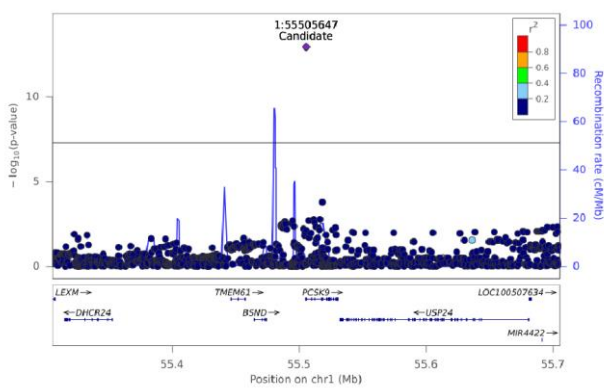

Posterior probabilities

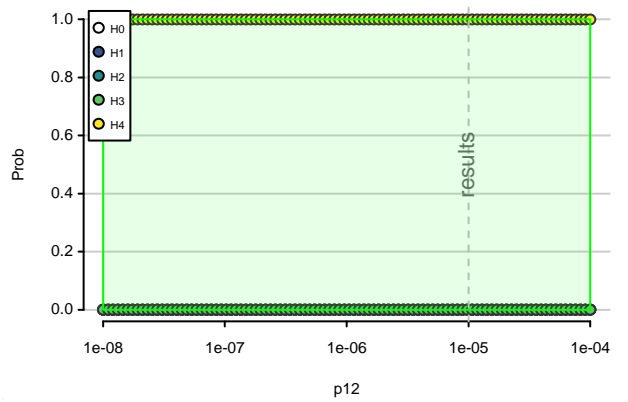

CAD - Chr 1 (109621861-110020621)

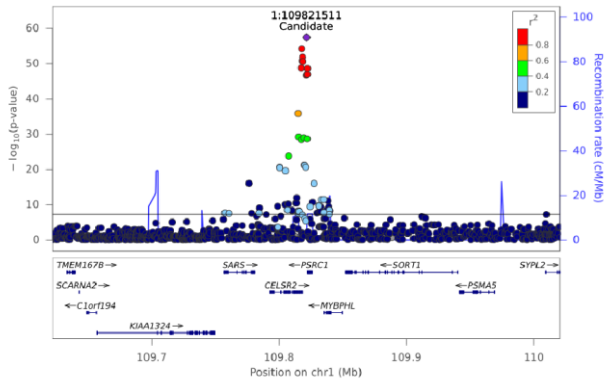

Posterior probabilities

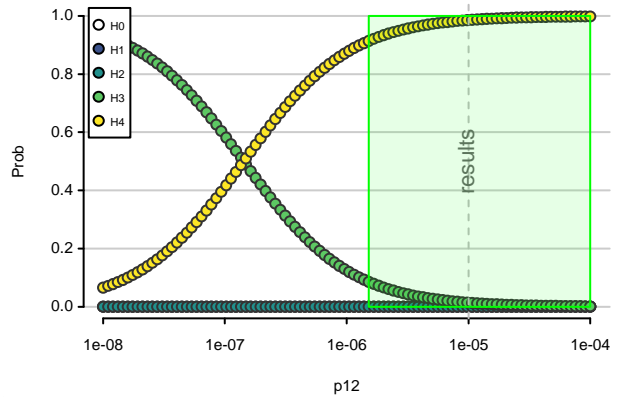

Total HexCer - Chr 1 (109621861-110020621)

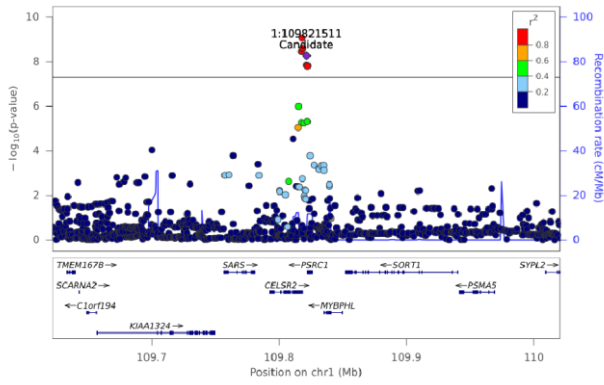

HexCer(d18:1/24:1) - Chr 1 (109621861-110020621)

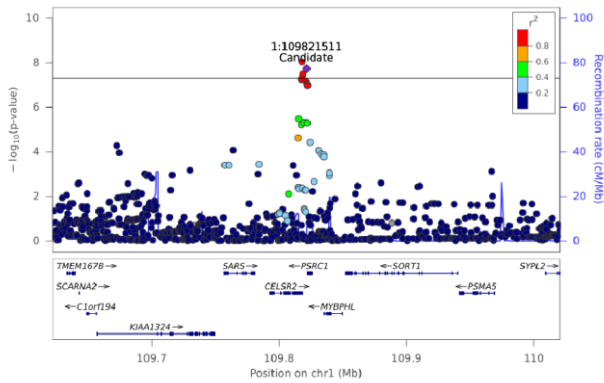

CAD - Chr 1 (230097883-230497633)

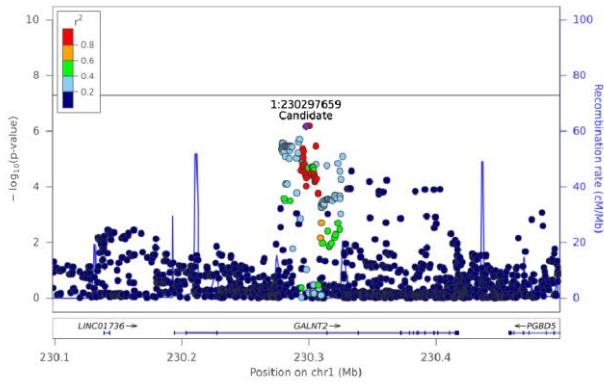

TG(54:2) [NL-18:0] - Chr 1 (230097883-230497633)

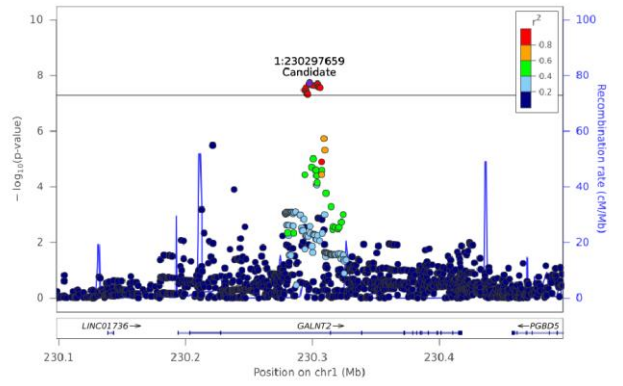

DG(18:0\_18:1) - Chr 1 (230097883-230497633)

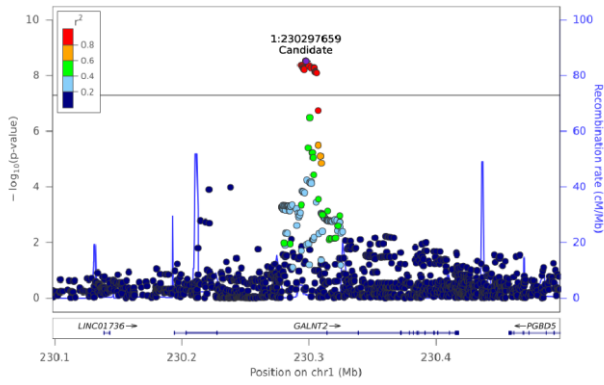

Total DG - Chr 1 (230097883-230497633)

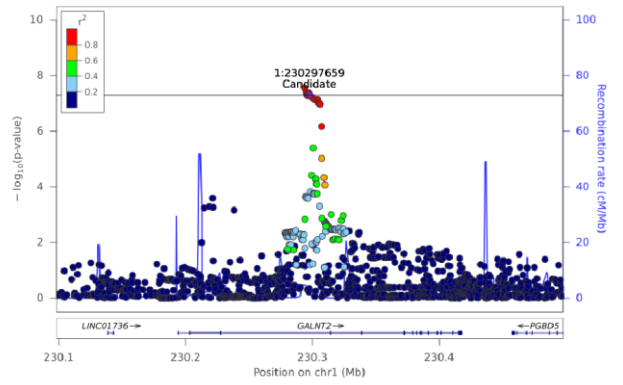

DG(18:1\_18:1) - Chr 1 (230097883-230497633)

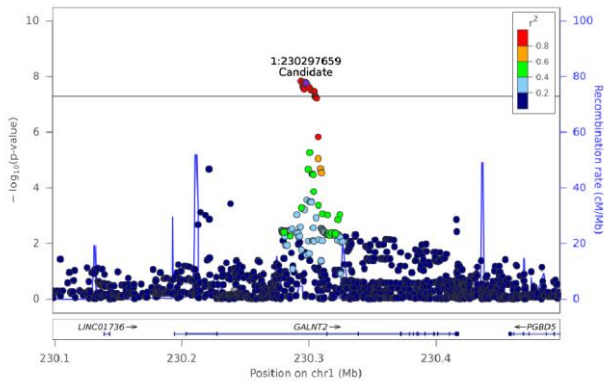

Posterior probabilities

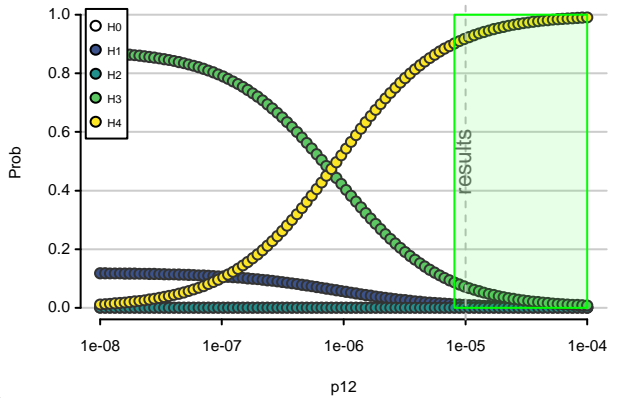

CAD - Chr 1 (230100836-230499925)

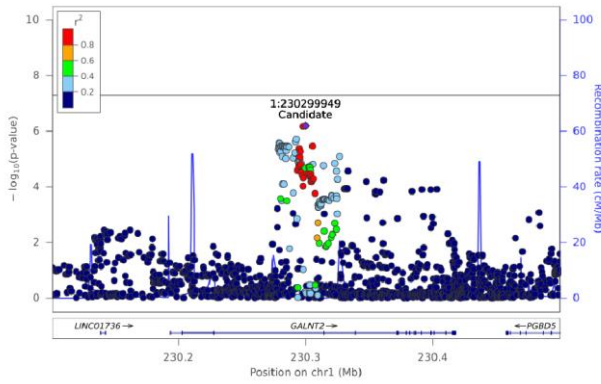

DG(18:0\_18:1) - Chr 1 (230100836-230499925)

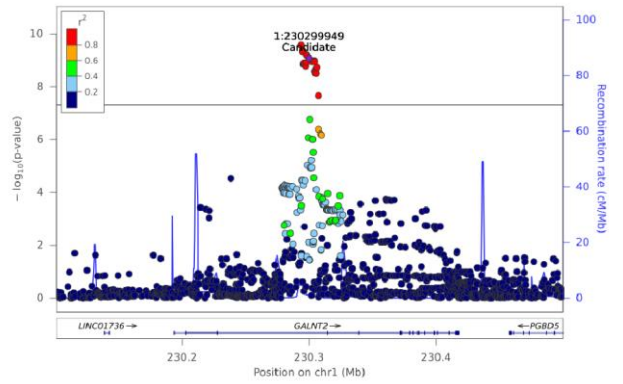

TG(54:2) [NL-18:0] - Chr 1 (230100836-230499925)

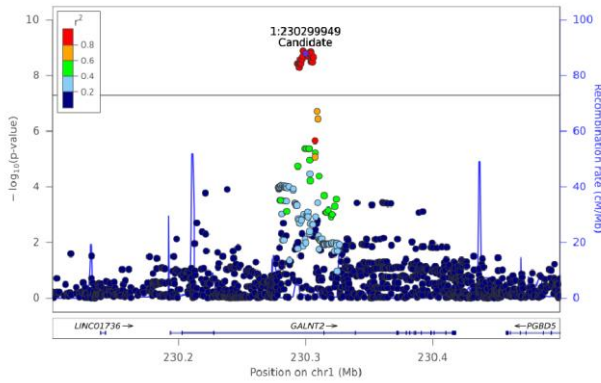

DG(16:0\_18:1) - Chr 1 (230100836-230499925)

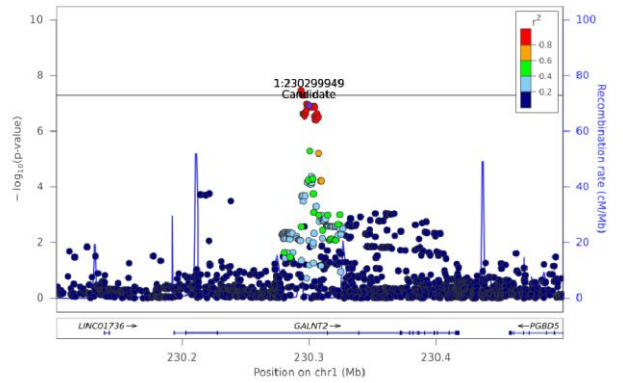

TG(54:3) [NL-18:1] - Chr 1 (230100836-230499925)

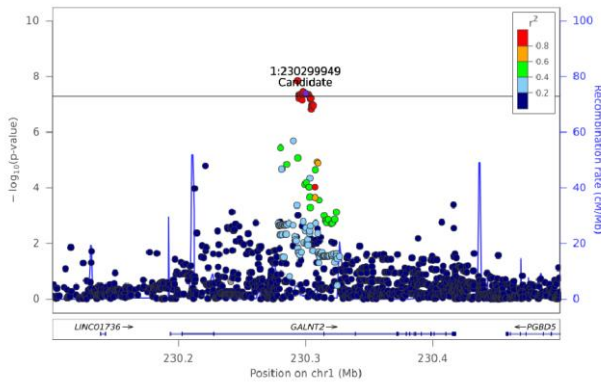

Posterior probabilities

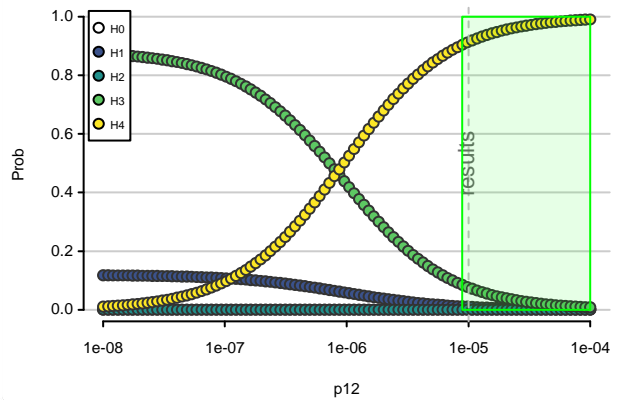

CAD - Chr 2 (21086225-21485848)

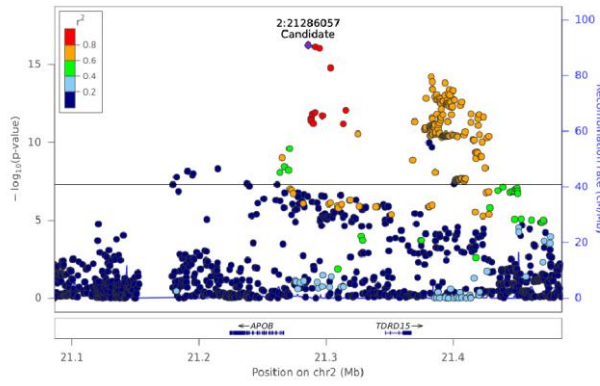

PC(16:0\_16:0) - Chr 2 (21086225-21485848)

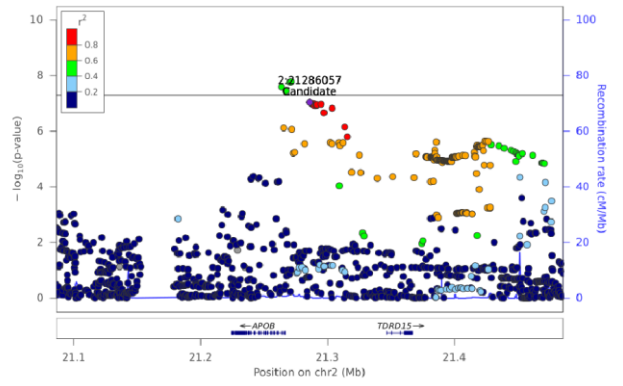

PC(16:0\_18:0) - Chr 2 (21086225-21485848)

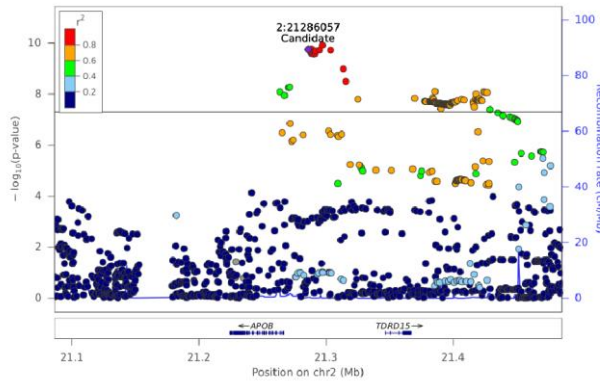

CE(20:2) - Chr 2 (21086225-21485848)

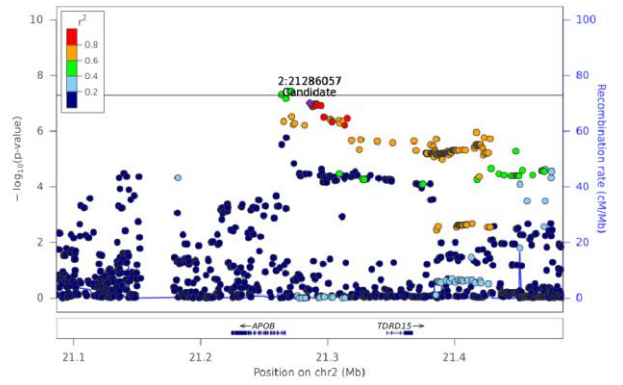

PC(38:2) - Chr 2 (21086225-21485848)

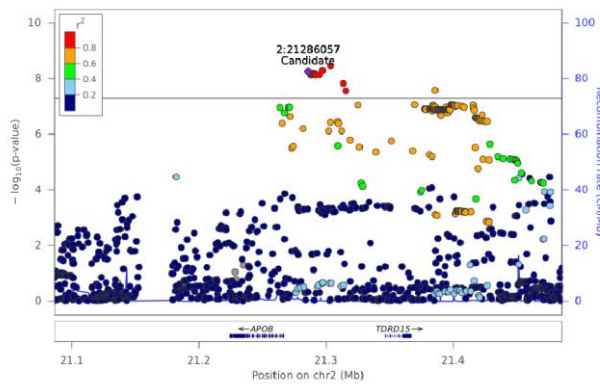

Posterior probabilities

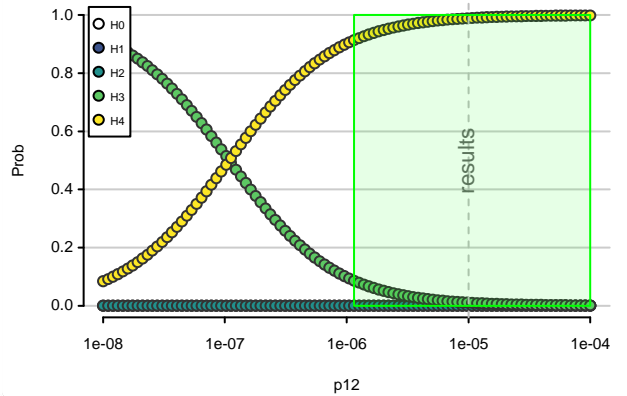



CAD - Chr 2 (23700054-24099798)

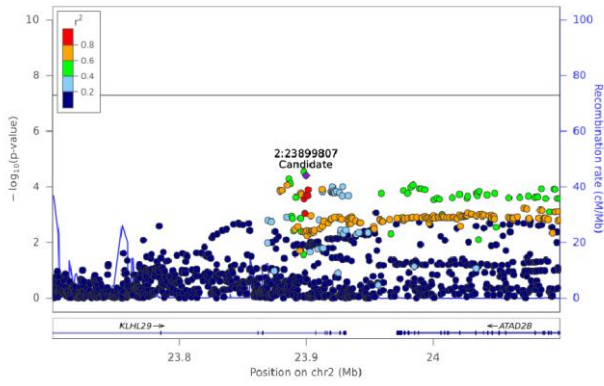

Posterior probabilities

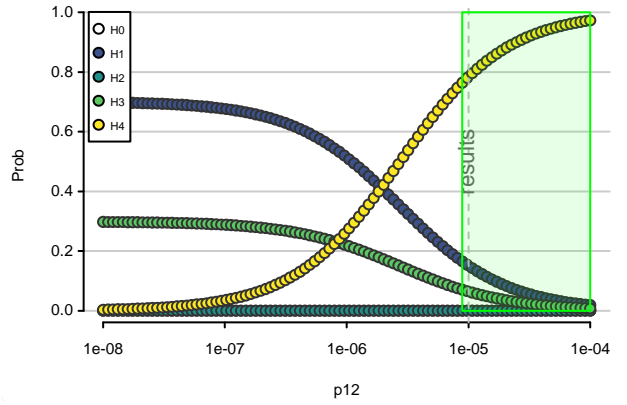

AC(16:0) - Chr 2 (23700054-24099798)

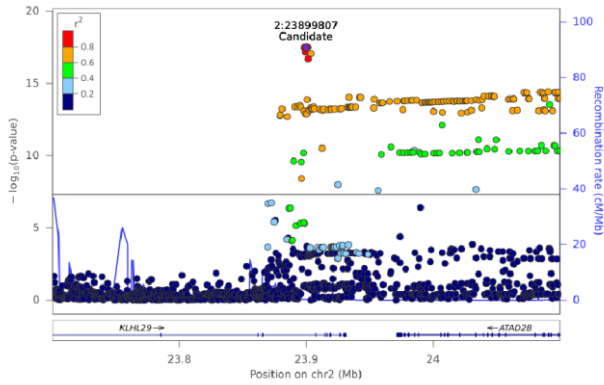

AC(18:1) - Chr 2 (23700054-24099798)

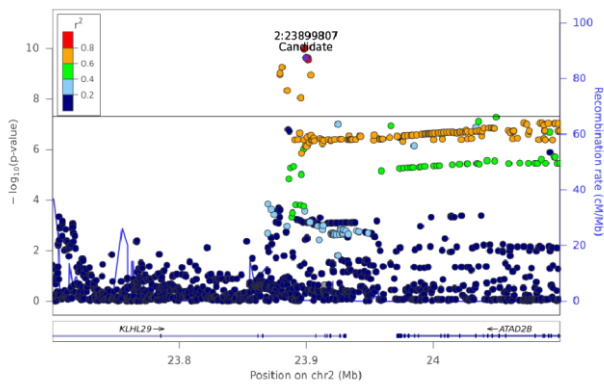

CAD - Chr 2 (43874118-44273800)

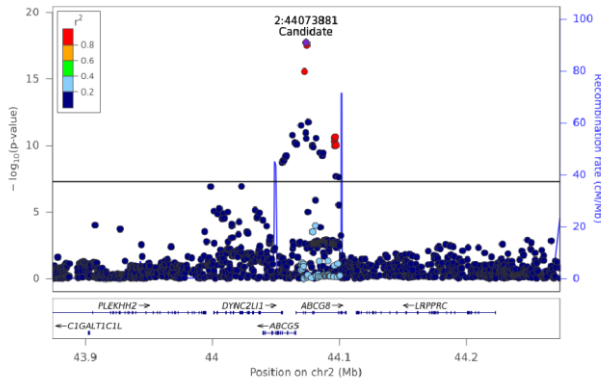

CE(20:2) - Chr 2 (43874118-44273800)

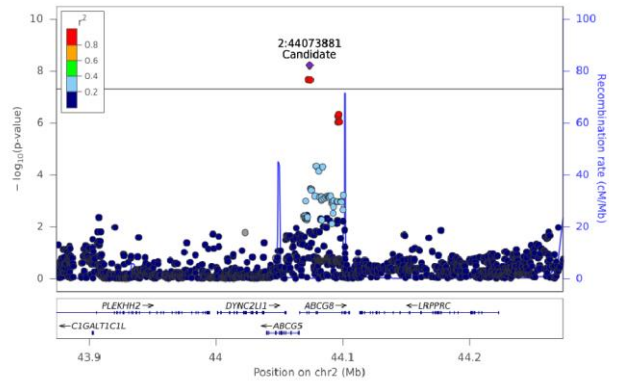

CE(24:4) - Chr 2 (43874118-44273800)

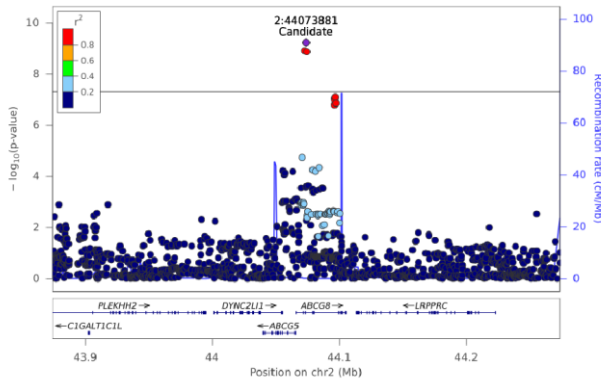

CE(24:5) - Chr 2 (43874118-44273800)

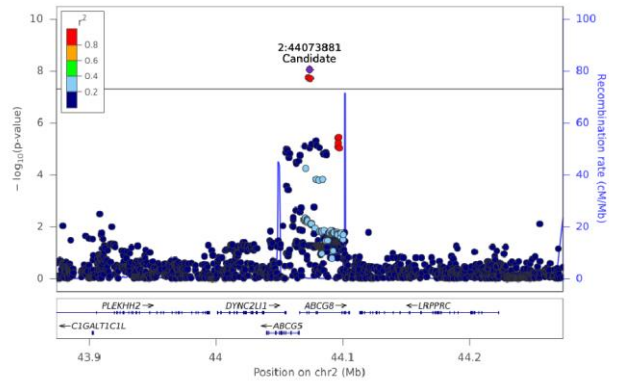

CE(24:1) - Chr 2 (43874118-44273800)

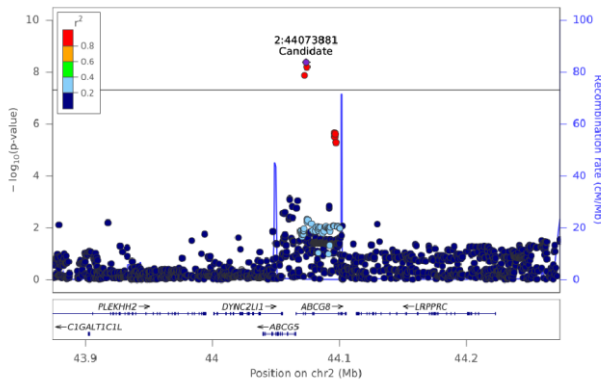

Posterior probabilities

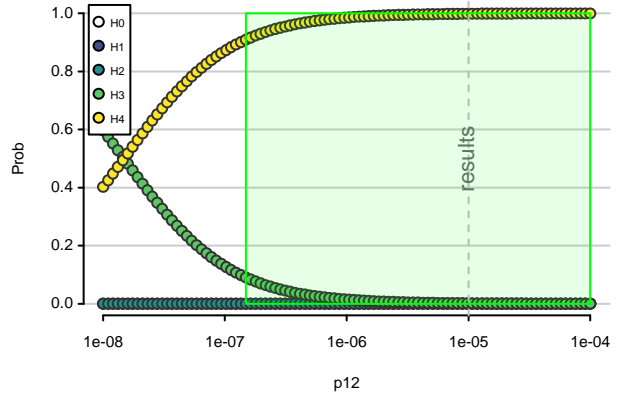

CAD - Chr 6 (31386131-31785228)

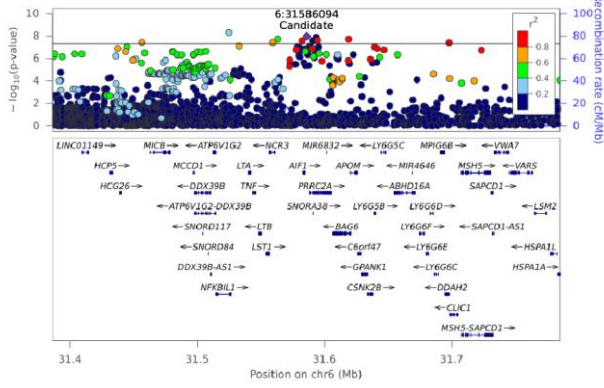

Posterior probabilities

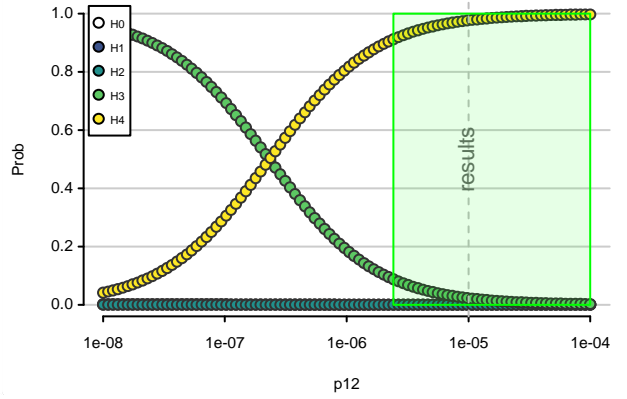

TG(50:2) [NL-18:2] - Chr 6 (31386131-31785228)

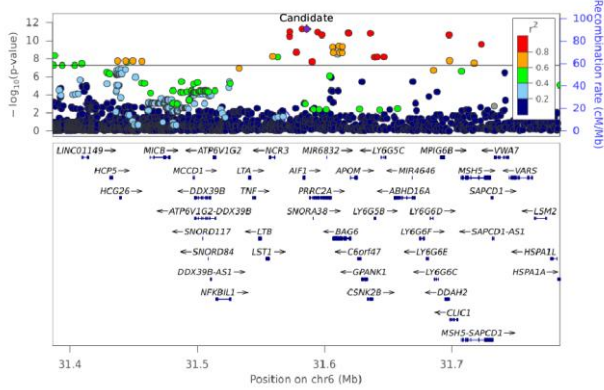

TG(50:1) [NL-18:1] - Chr 6 (31386131-31785228)

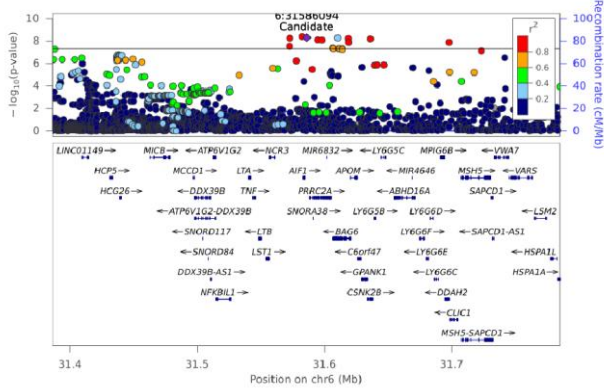



CAD - Chr 7 (44381979-44780274)

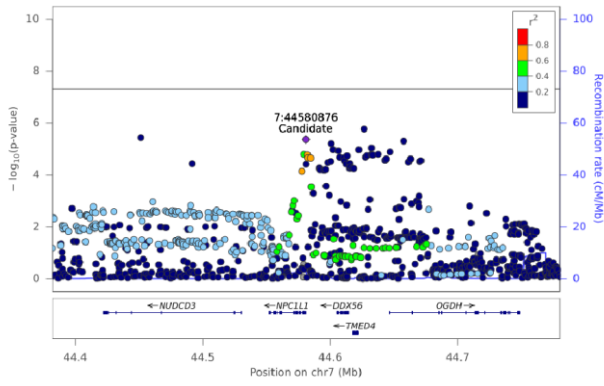

CE(18:0) - Chr 7 (44381979-44780274)

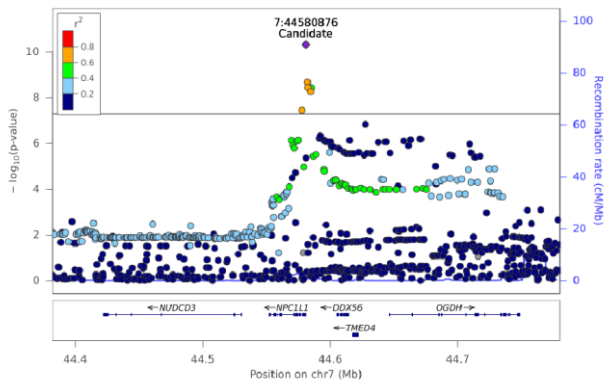

Posterior probabilities

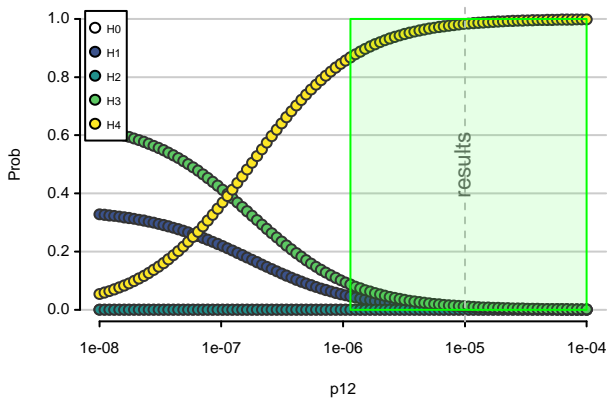

CAD - Chr 8 (126279544-126678921)

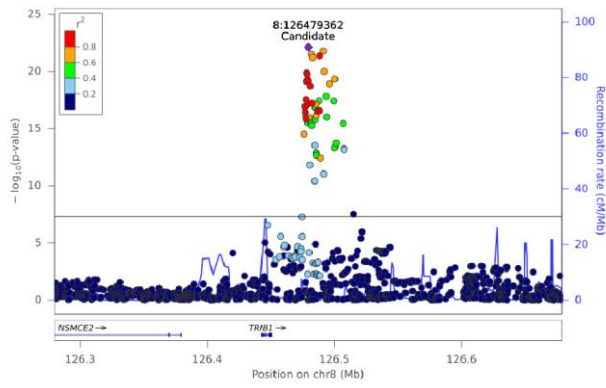

SM(d18:0/22:0) - Chr 8 (126279544-126678921)

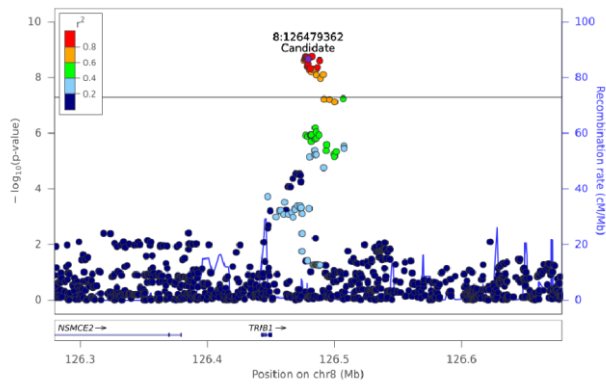

Posterior probabilities

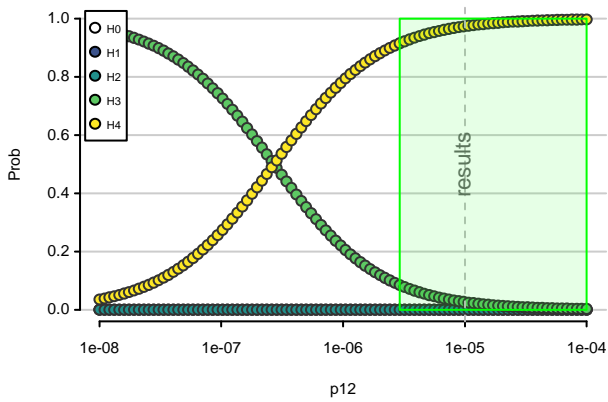

CAD - Chr 8 (126288808-126688215)

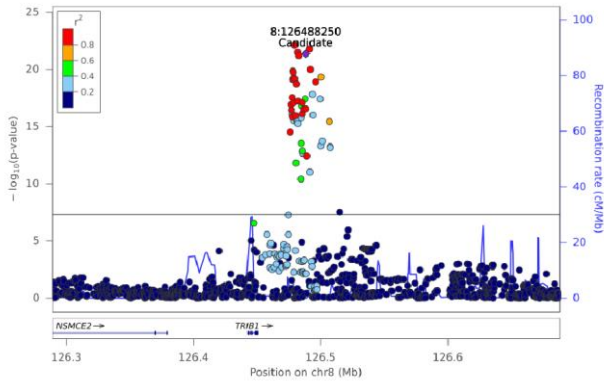

PC(36:0) - Chr 8 (126288808-126688215)

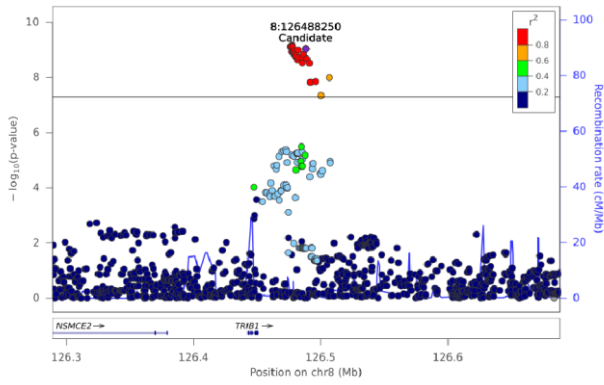

Posterior probabilities

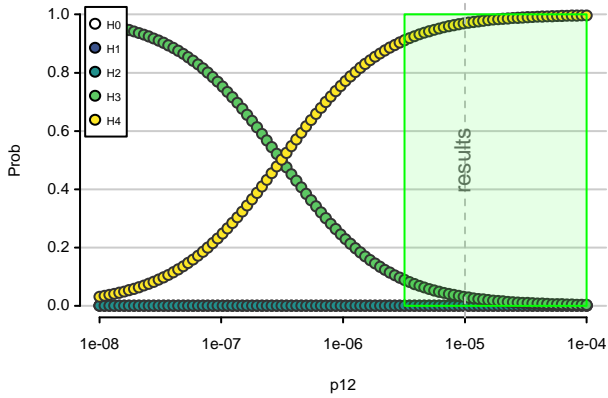

CAD - Chr 9 (107386294-107786017)

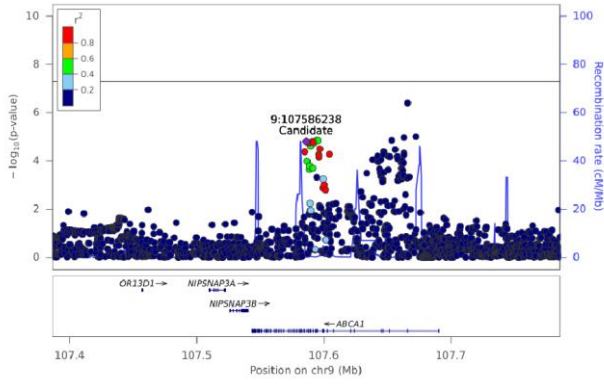

Posterior probabilities

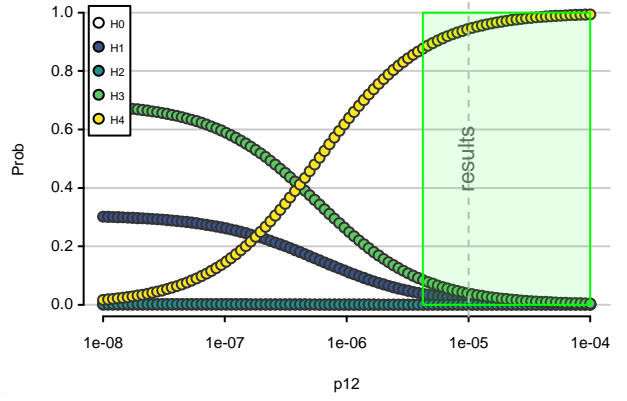

Hex3Cer(d18:1/22:0) - Chr 9 (107386294-107786017)

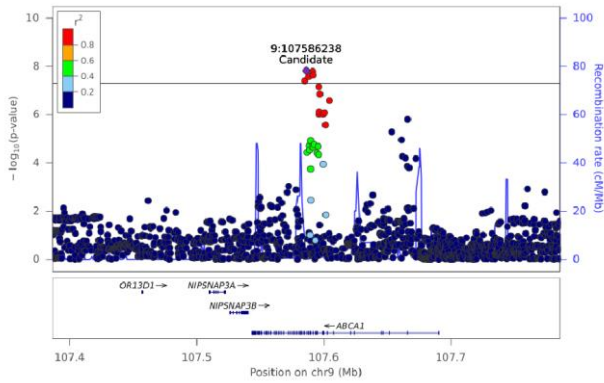

Hex3Cer(d18:1/24:0) - Chr 9 (107386294-107786017)

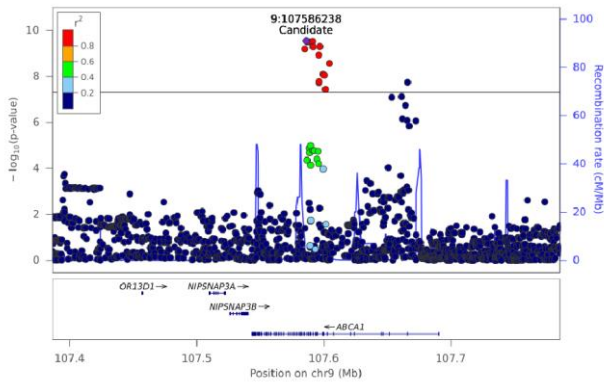

CAD - Chr 9 (107465986-107865928)

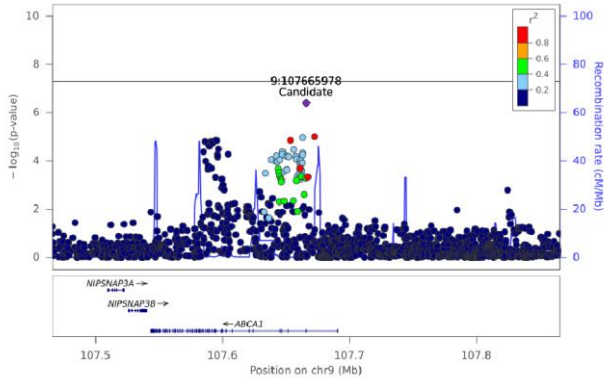

Hex3Cer(d18:1/24:1) - Chr 9 (107465986-107865928)

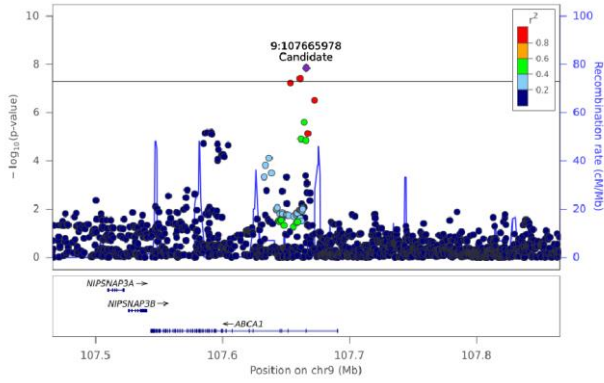

Posterior probabilities

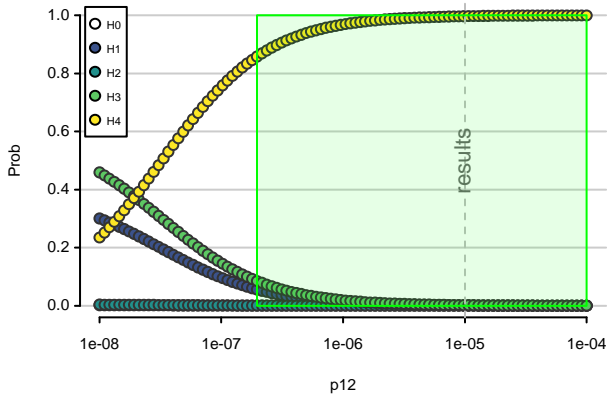

CAD - Chr 9 (135941932-136341776)

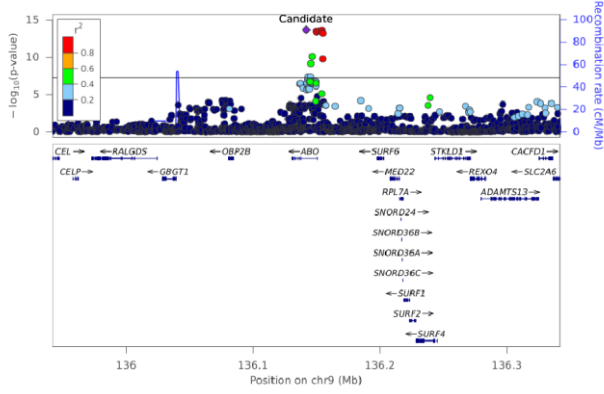

CE(18:0) - Chr 9 (135941932-136341776)

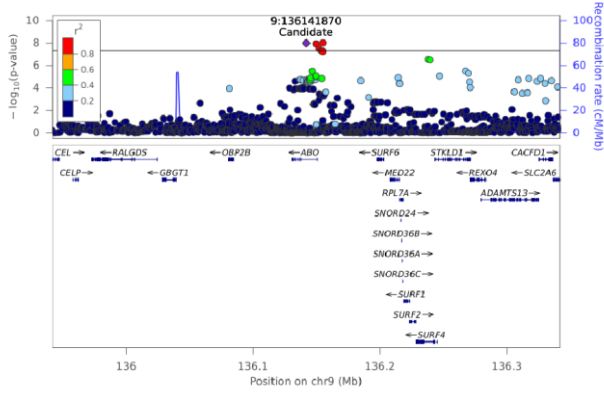

Posterior probabilities

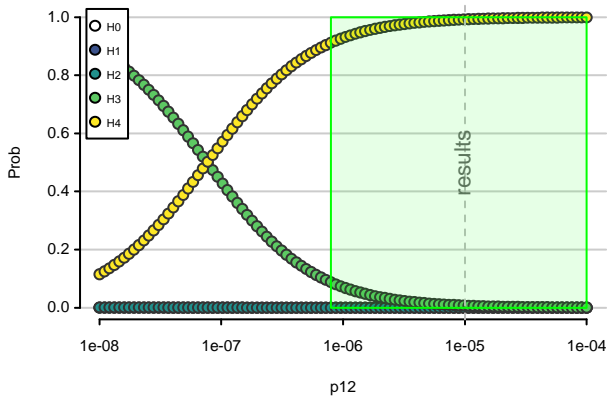

CAD - Chr 10 (101875936-102275471)

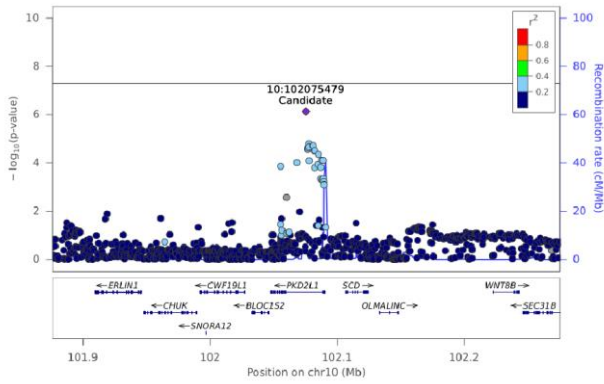

PC(16:1\_18:2) - Chr 10 (101875936-102275471)

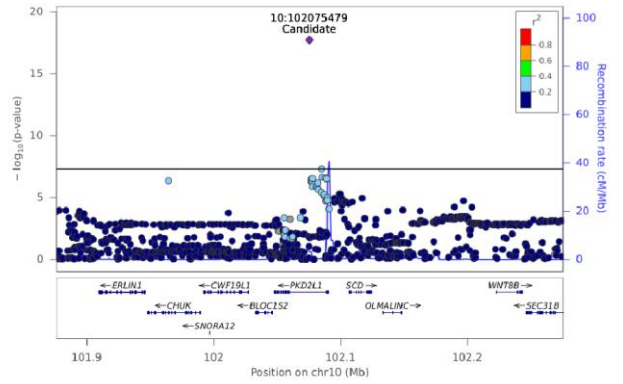

LPC(16:1) [sn1] - Chr 10 (101875936-102275471)

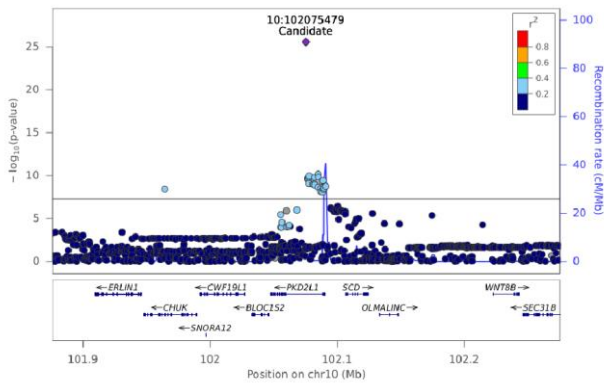

AC(16:1) - Chr 10 (101875936-102275471)

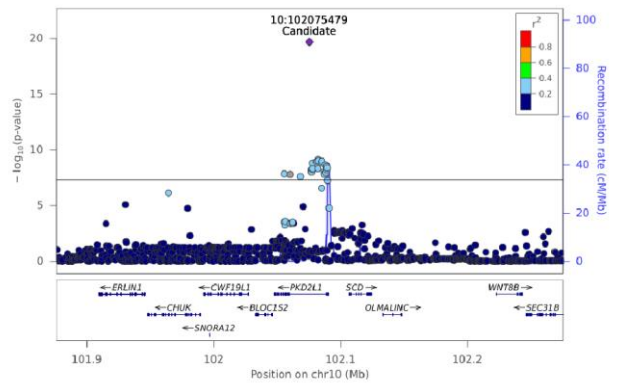

LPC(16:1) [sn2] - Chr 10 (101875936-102275471)

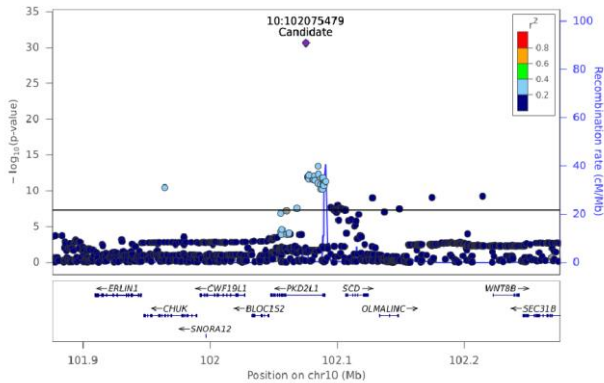

Posterior probabilities

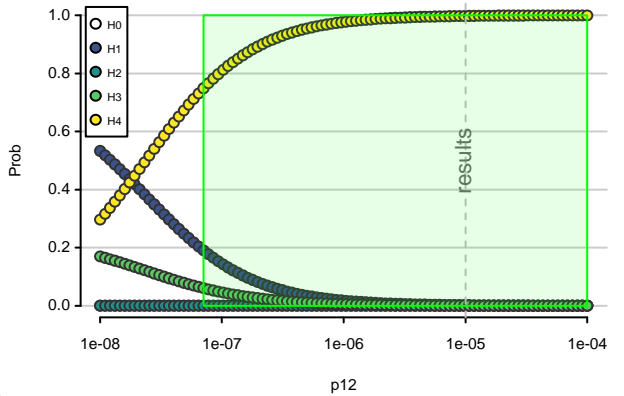

CAD - Chr 11 (116386360-116785341)

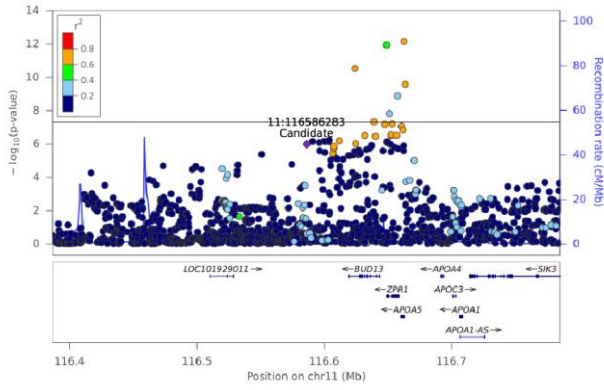

Posterior probabilities

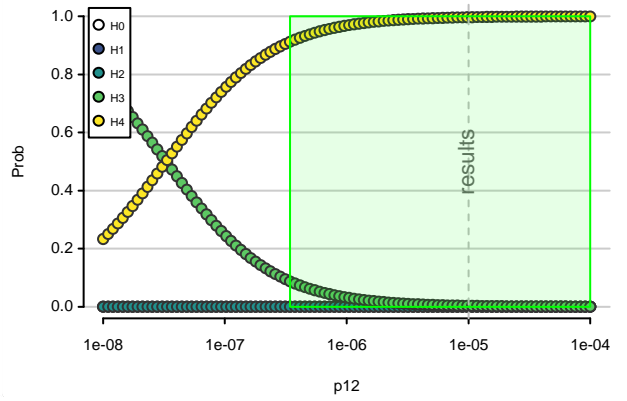

DG(18:1\_18:2) - Chr 11 (116386360-116785341)

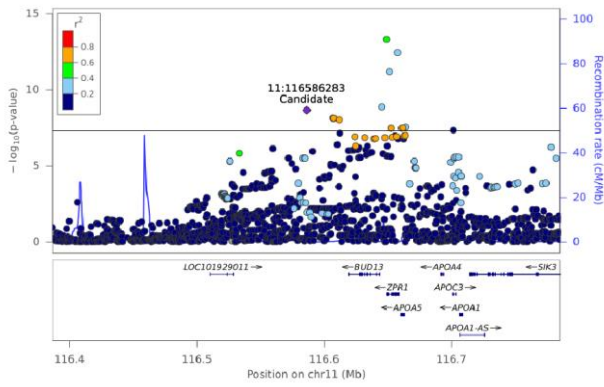

CE(16:2) - Chr 11 (116386360-116785341)

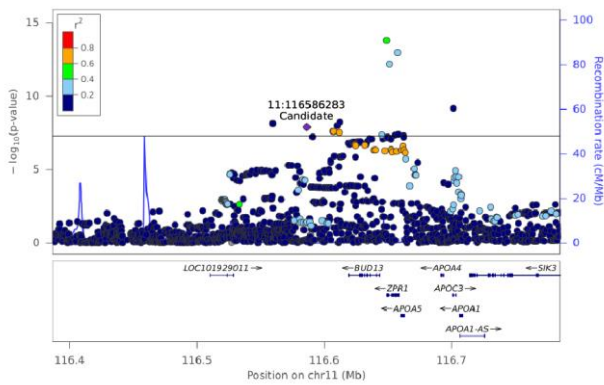



CAD - Chr 11 (116391073-116789849)

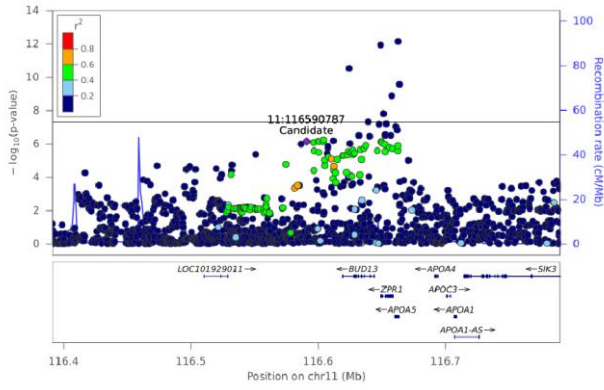

TG(54:2) [NL-18:0] - Chr 11 (116391073-116789849)

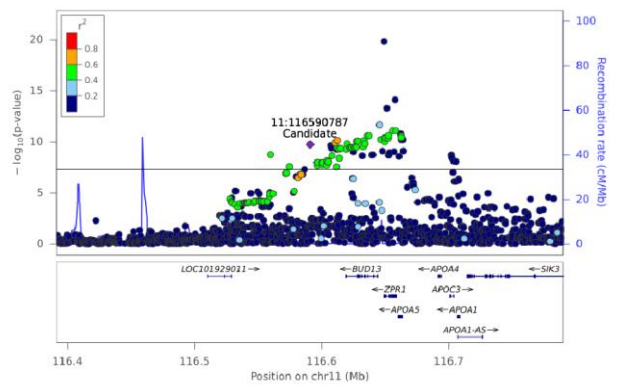

DG(18:0\_18:1) - Chr 11 (116391073-116789849)

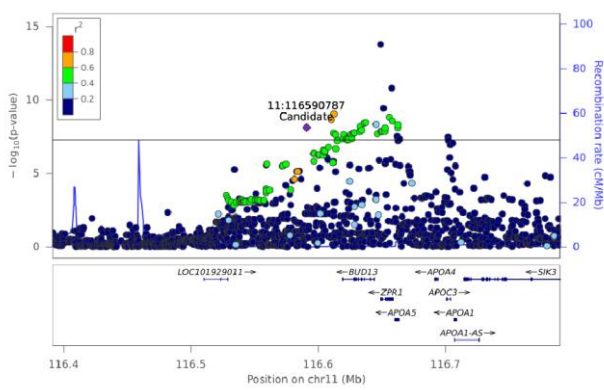

CE(22:6) - Chr 11 (116391073-116789849)

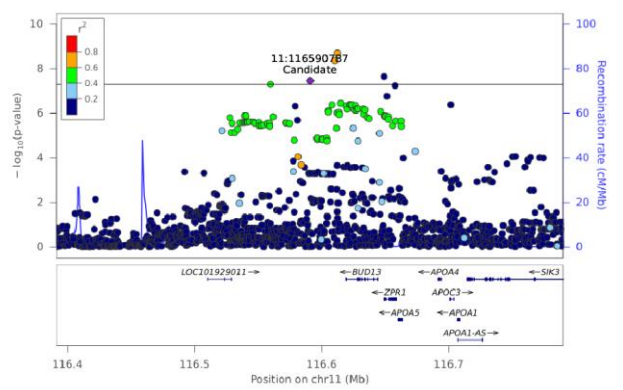

TG(54:1) [NL-18:1] - Chr 11 (116391073-116789849)

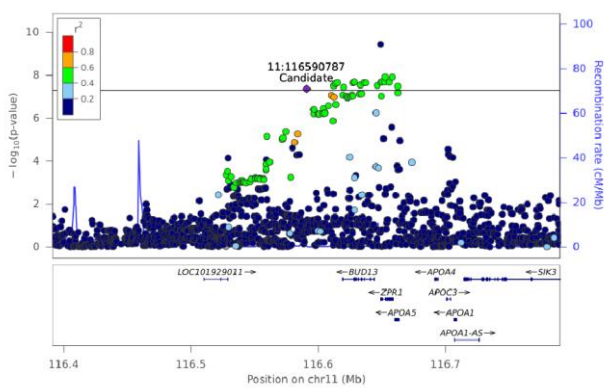

Posterior probabilities

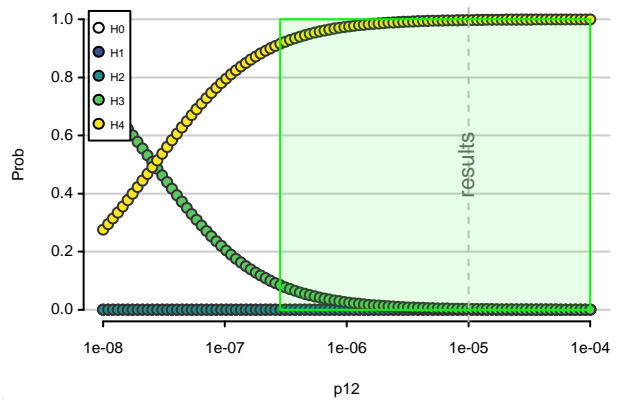

CAD - Chr 11 (116407583-116807368)

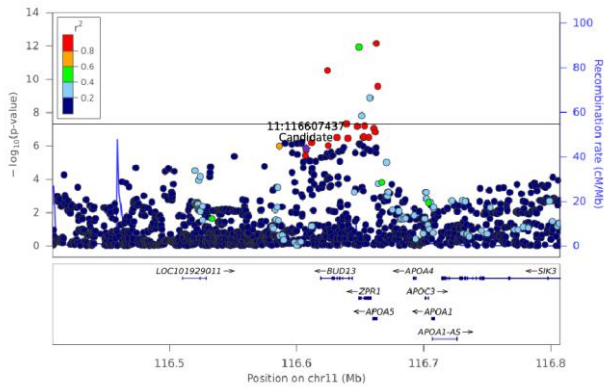

DG(18:2\_18:2) - Chr 11 (116407583-116807368)

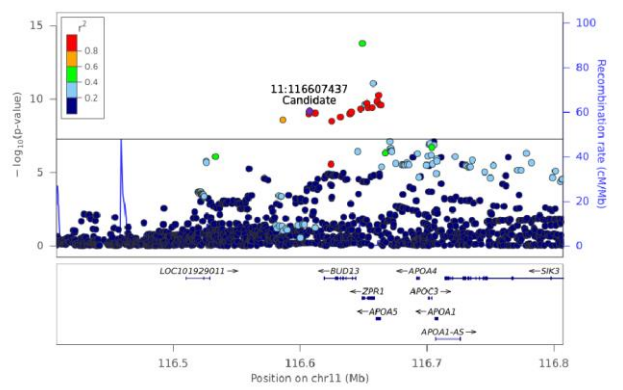

TG(54:4) [NL-18:0] - Chr 11 (116407583-116807368)

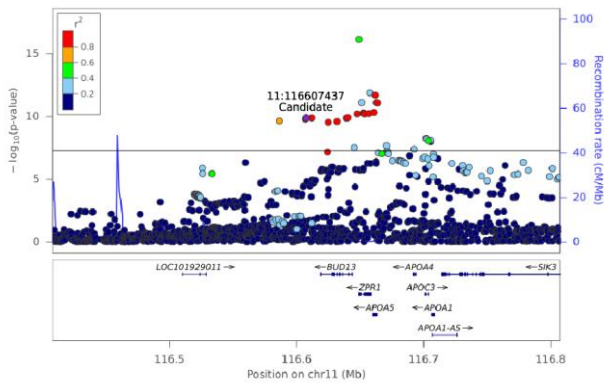

CE(16:1) - Chr 11 (116407583-116807368)

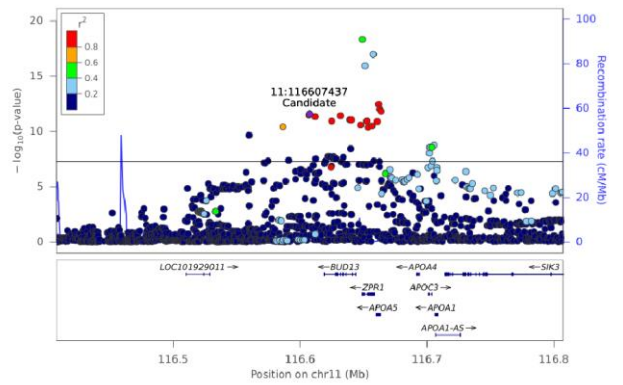

TG(54:4) [NL-18:2] - Chr 11 (116407583-116807368)

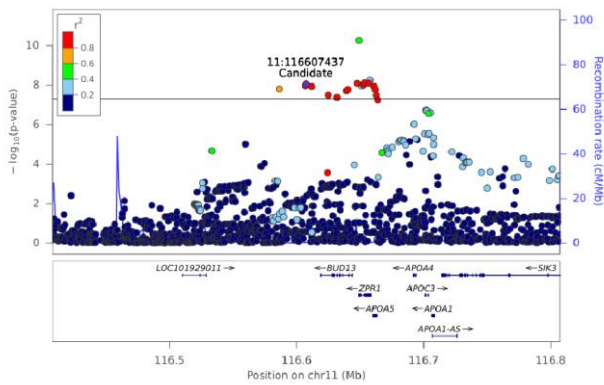

Posterior probabilities

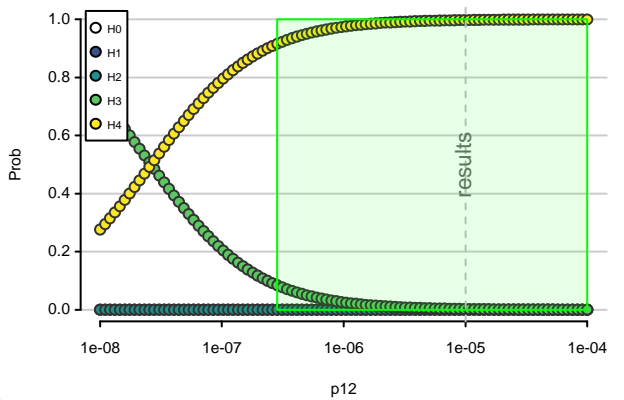

CAD - Chr 11 (116448927-116848857)

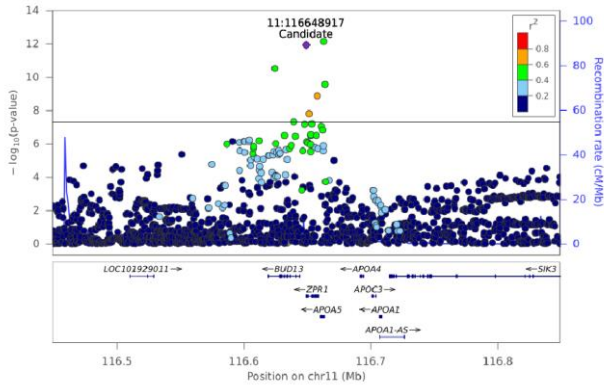

TG(51:2) [NL-15:0] - Chr 11 (116448927-116848857)

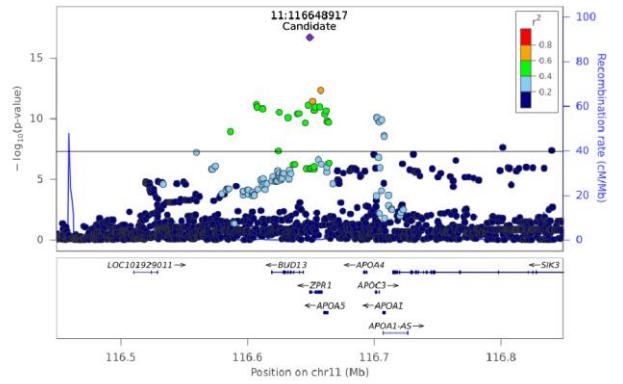

TG(54:2) [NL-18:0] - Chr 11 (116448927-116848857)

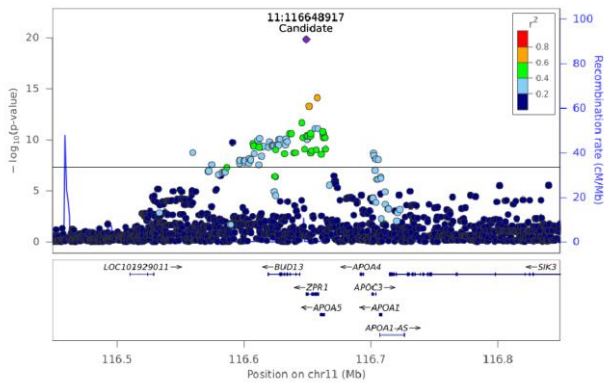

TG(54:4) [NL-18:0] - Chr 11 (116448927-116848857)

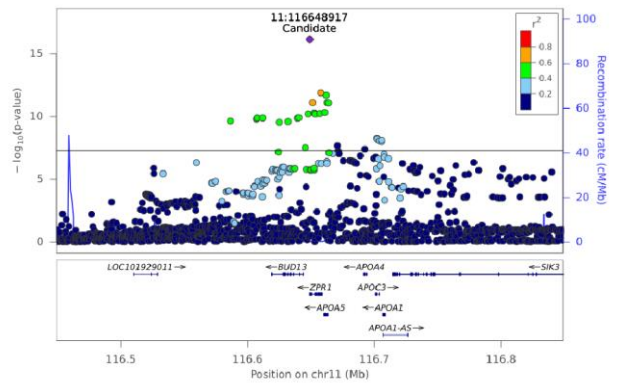

DG(18:1\_18:3) - Chr 11 (116448927-116848857)

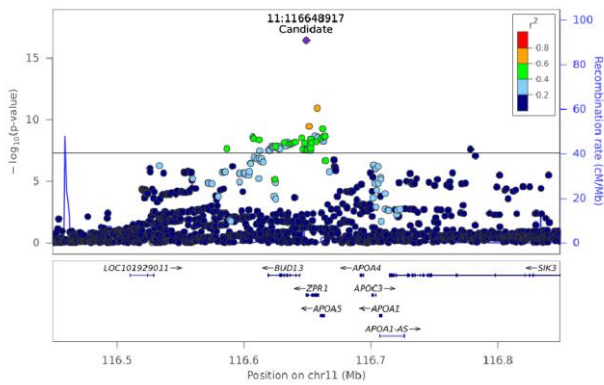

Posterior probabilities

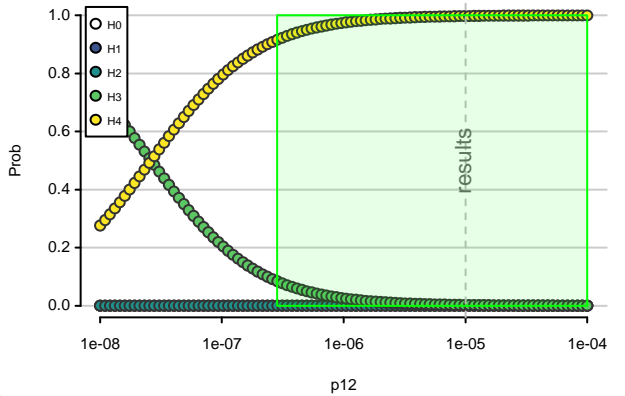

CAD - Chr 11 (116462788-116862245)

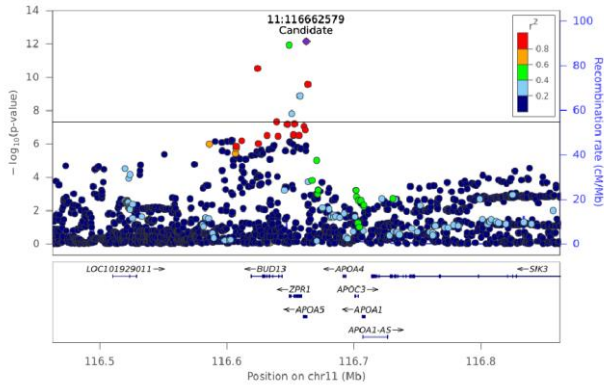

PE(18:1\_18:1) - Chr 11 (116462788-116862245)

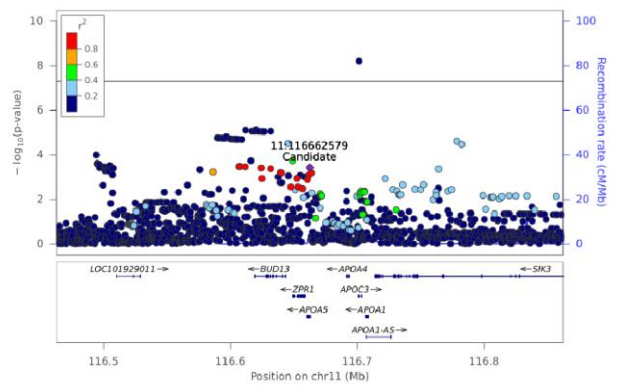

CE(22:0) - Chr 11 (116462788-116862245)

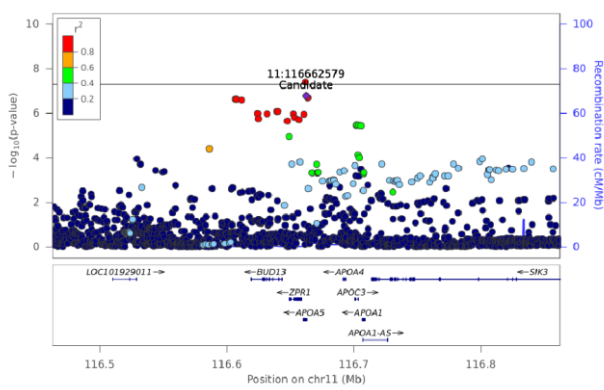

Posterior probabilities

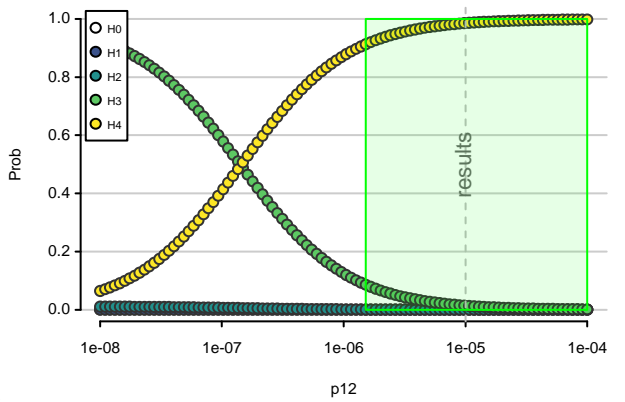

PE(18:1\_18:2) - Chr 11 (116462788-116862245)

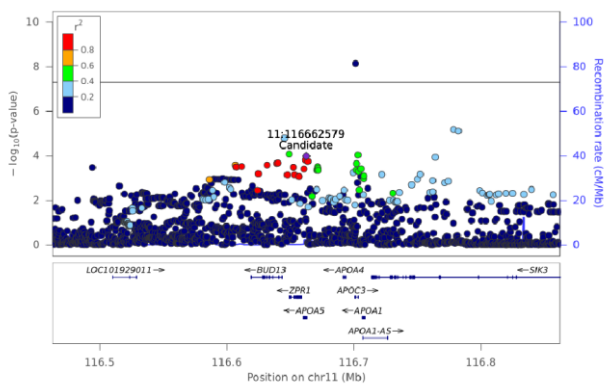



CAD - Chr 12 (121216911-121616464)

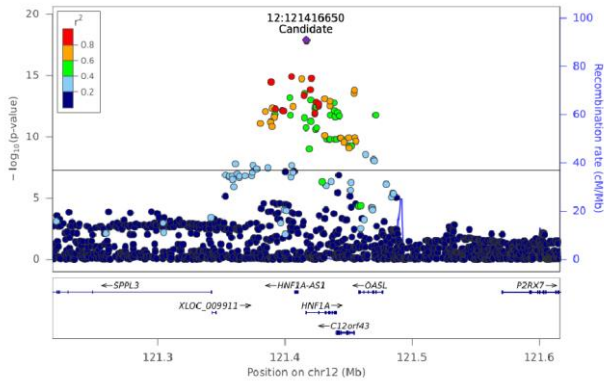

Cer(d18:1/24:1) - Chr 12 (121216911-121616464)

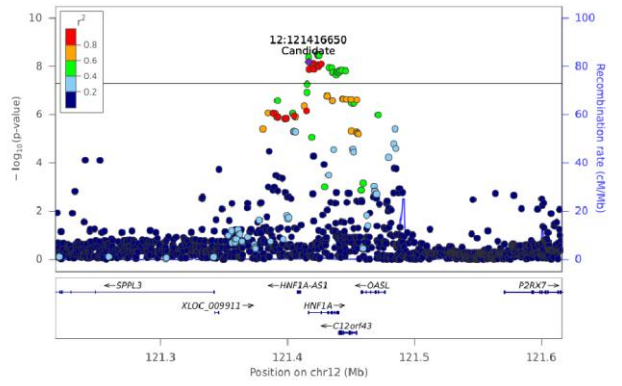

Cer(d18:2/24:1) - Chr 12 (121216911-121616464)

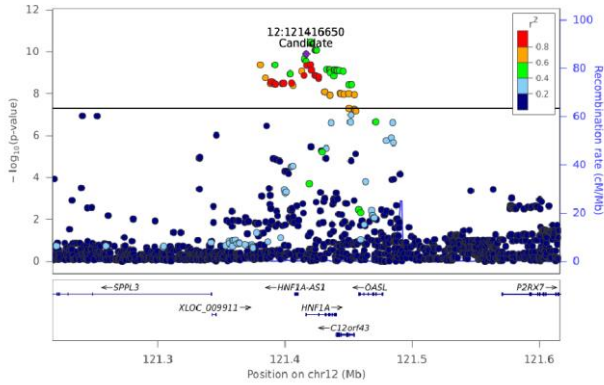

Cer(d17:1/24:1) - Chr 12 (121216911-121616464)

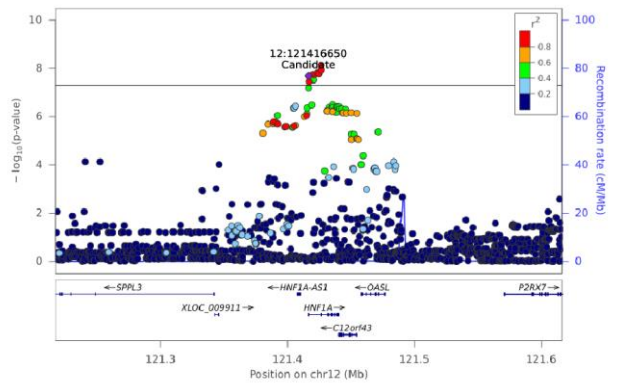

PC(36:0) - Chr 12 (121216911-121616464)

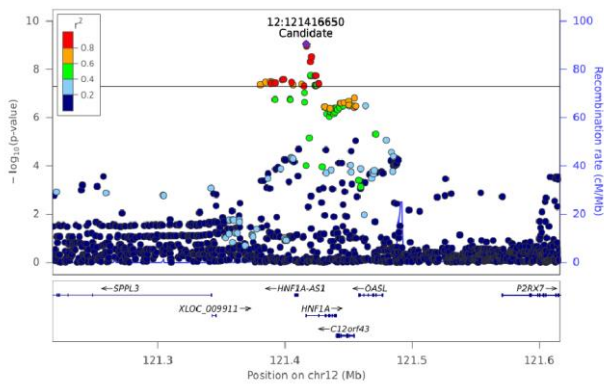

Posterior probabilities

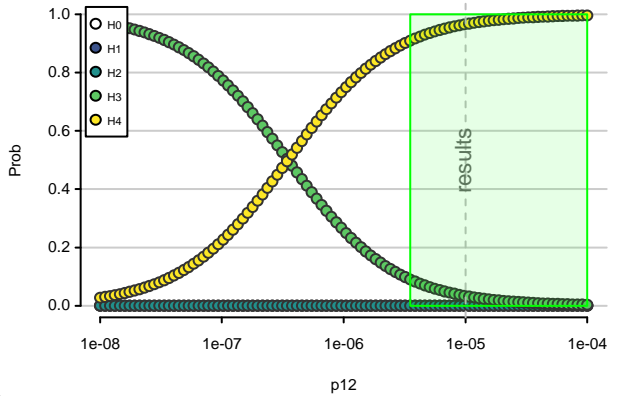

CAD - Chr 12 (121217765-121616464)

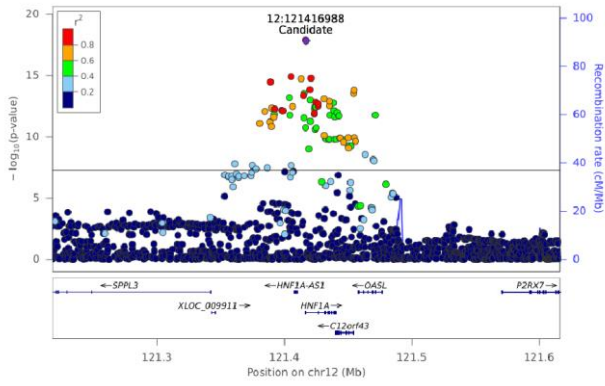

SM(d18:0/22:0) - Chr 12 (121217765-121616464)

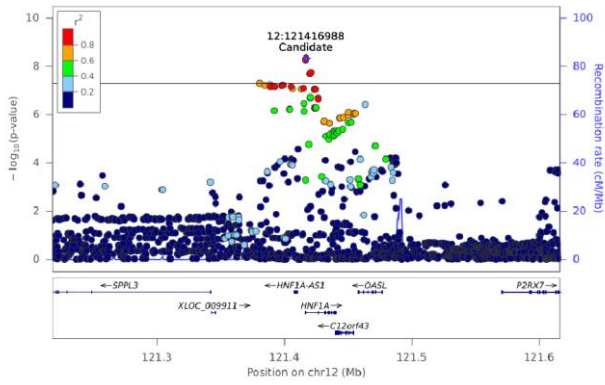

Posterior probabilities

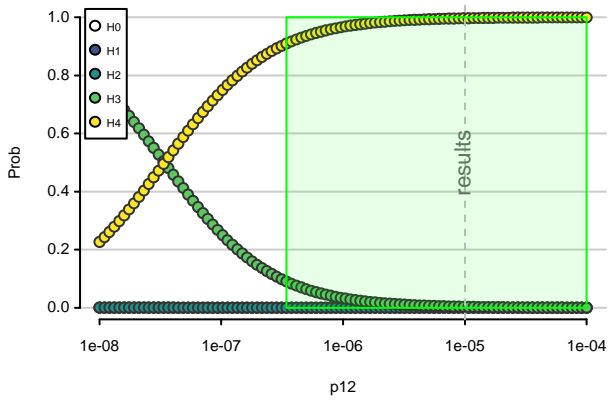

CAD - Chr 15 (58481406-58880051)

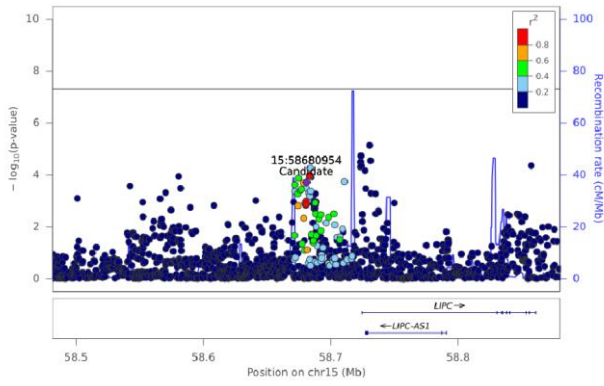

PE(18:0\_18:1) - Chr 15 (58481406-58880051)

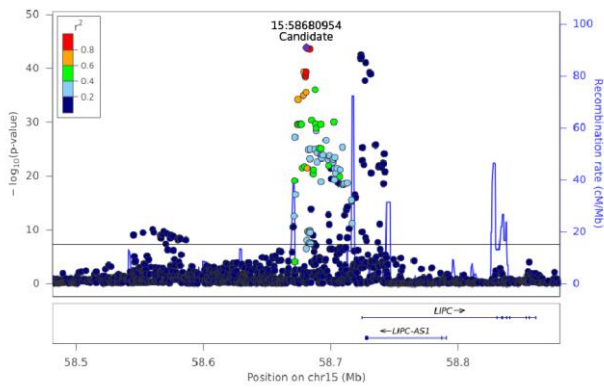

Posterior probabilities

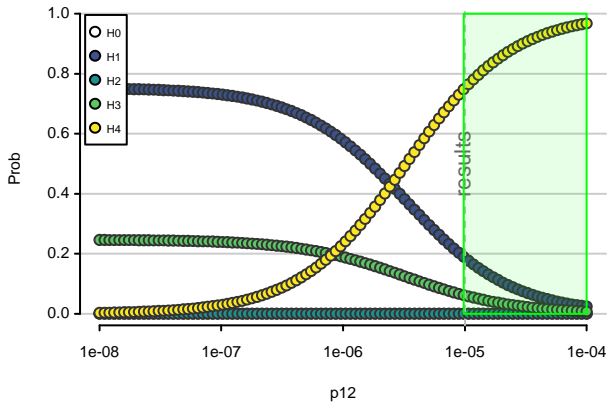

CAD - Chr 15 (58483611-58882792)

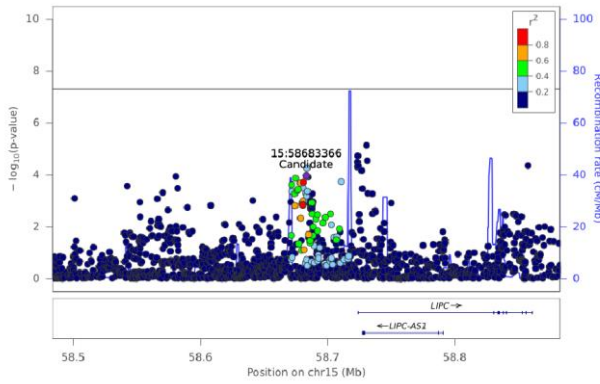

PE(17:0\_20:4) - Chr 15 (58483611-58882792)

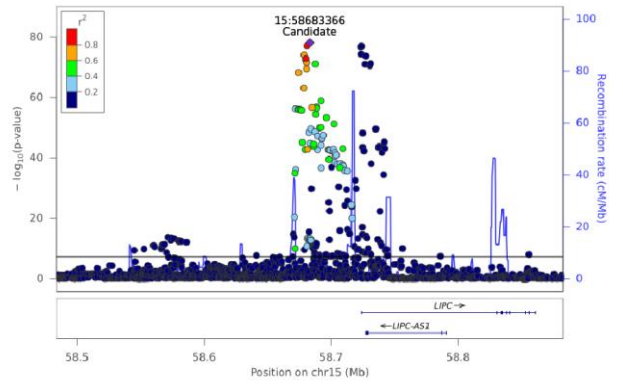

PE(18:1\_18:2) - Chr 15 (58483611-58882792)

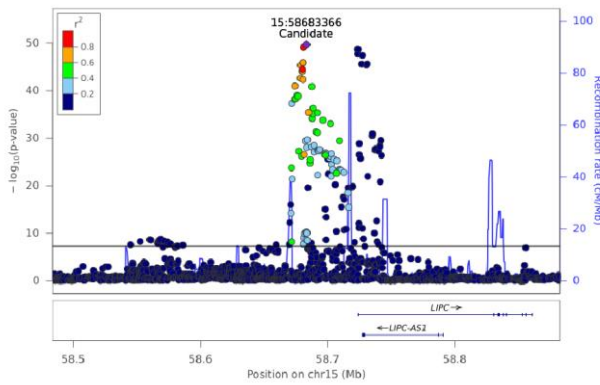

PE(16:0\_18:2) - Chr 15 (58483611-58882792)

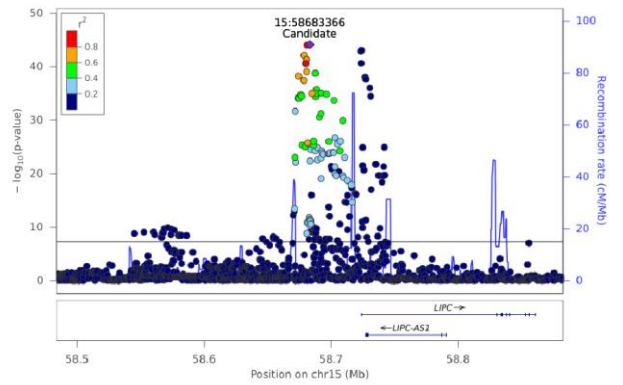

PE(16:0\_16:0) - Chr 15 (58483611-58882792)

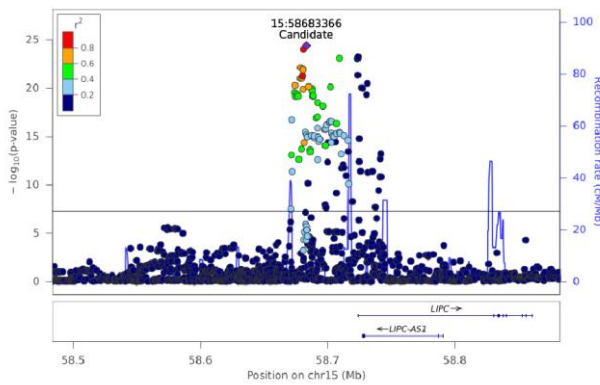

Posterior probabilities

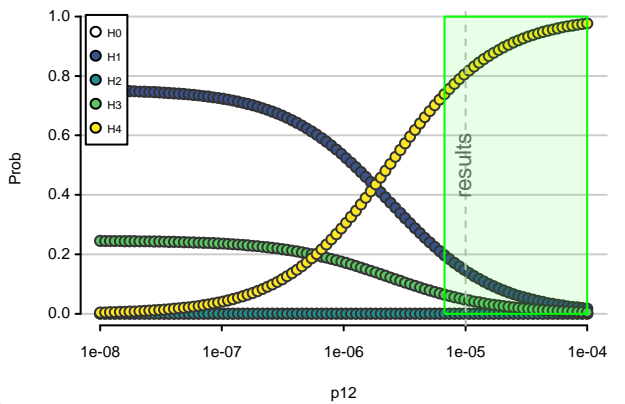



CAD - Chr 15 (58524080-58923206)

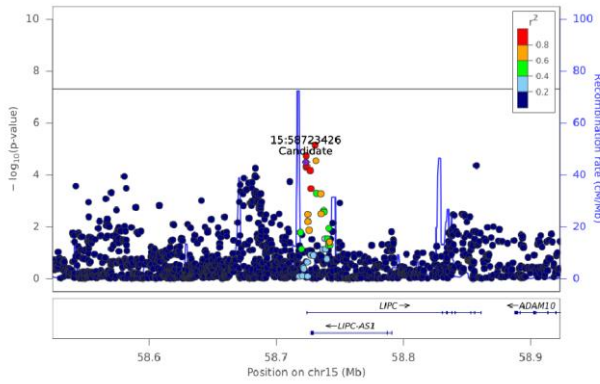

PE(16:1\_18:2) - Chr 15 (58524080-58923206)

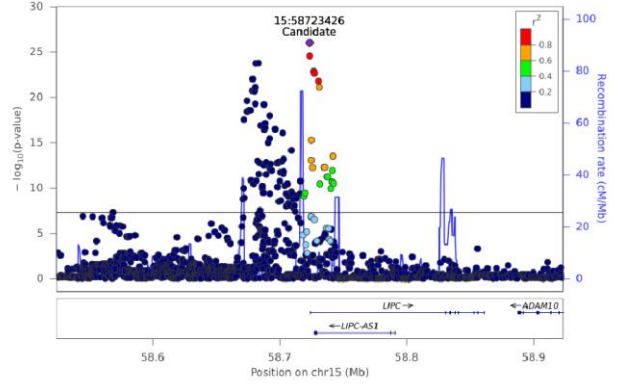

PE(15-MHDA\_22:6) - Chr 15 (58524080-58923206)

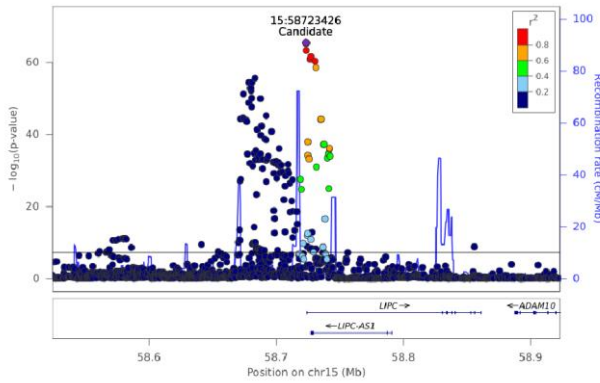

PE(15-MHDA\_20:4) - Chr 15 (58524080-58923206)

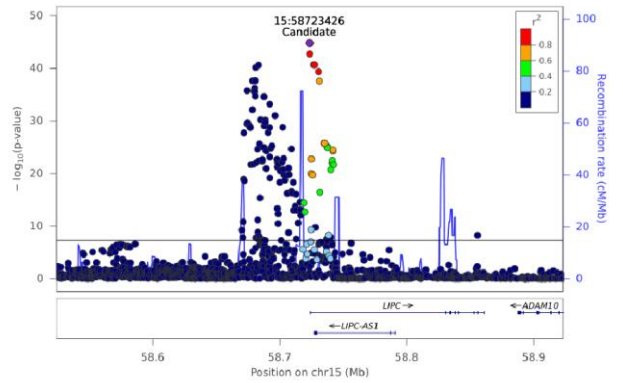

PE(18:0\_20:3) (b) - Chr 15 (58524080-58923206)

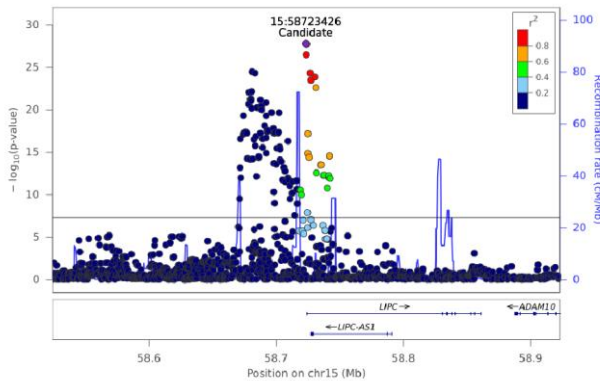

Posterior probabilities

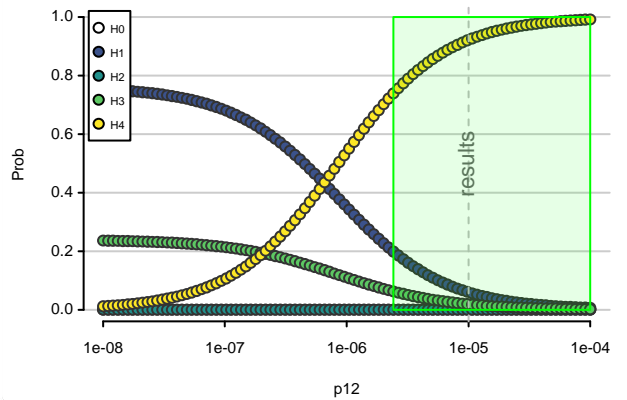

CAD - Chr 15 (58524080-58923206)

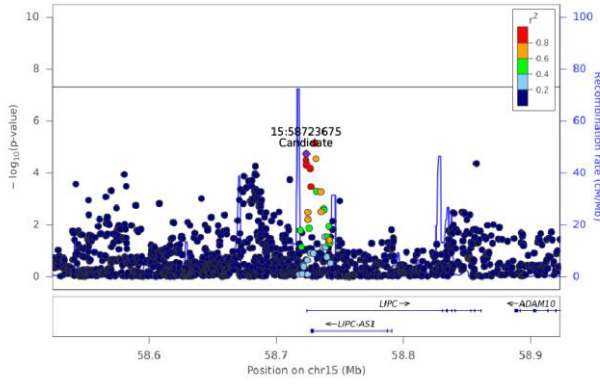

Total DG - Chr 15 (58524080-58923206)

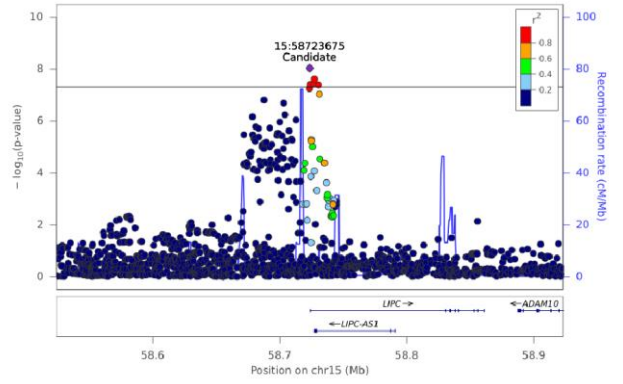

LPE(20:4) [sn1] - Chr 15 (58524080-58923206)

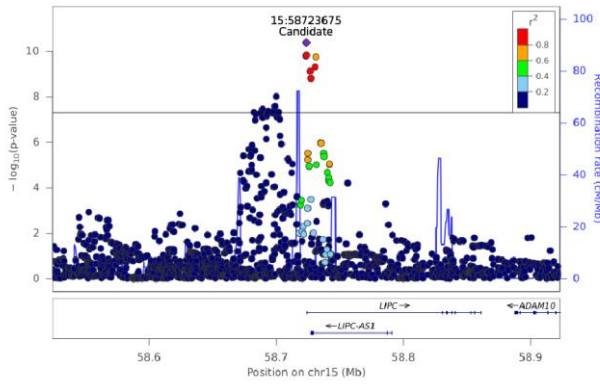

LPE(22:6) [sn2] - Chr 15 (58524080-58923206)

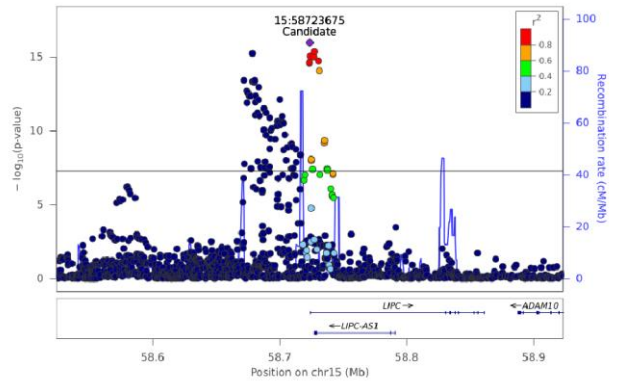

DG(18:1\_20:4) - Chr 15 (58524080-58923206)

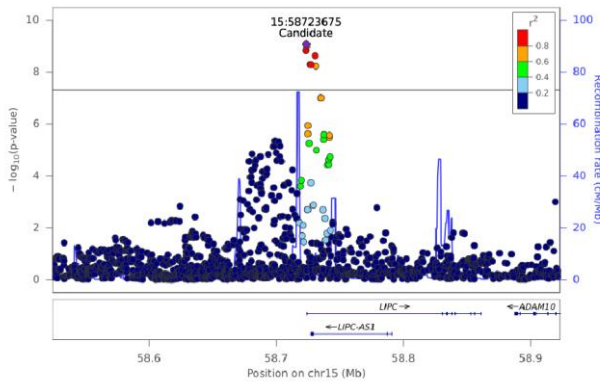

Posterior probabilities

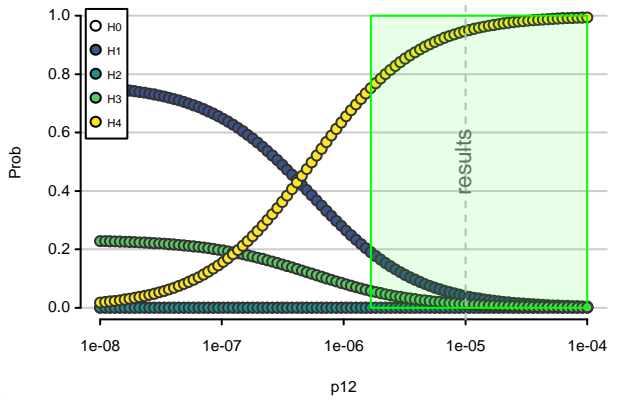

CAD - Chr 15 (58524080-58923790)

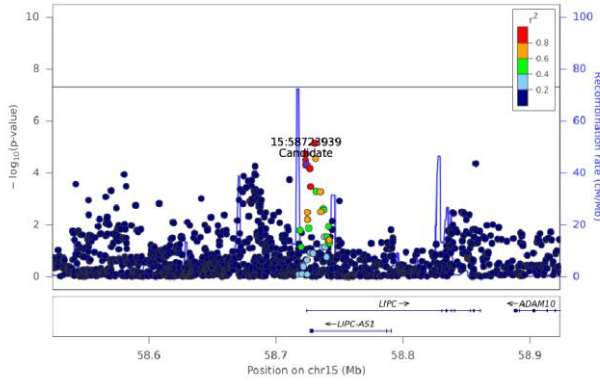

Total PG - Chr 15 (58524080-58923790)

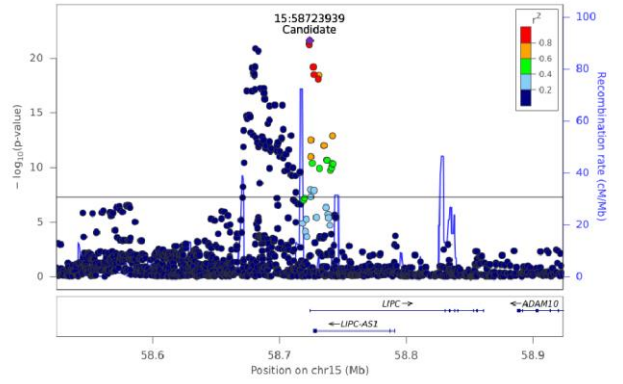

PG(34:2) - Chr 15 (58524080-58923790)

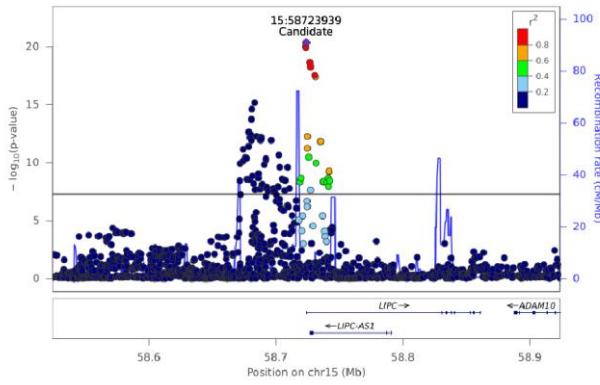

PE(38:5) (a) - Chr 15 (58524080-58923790)

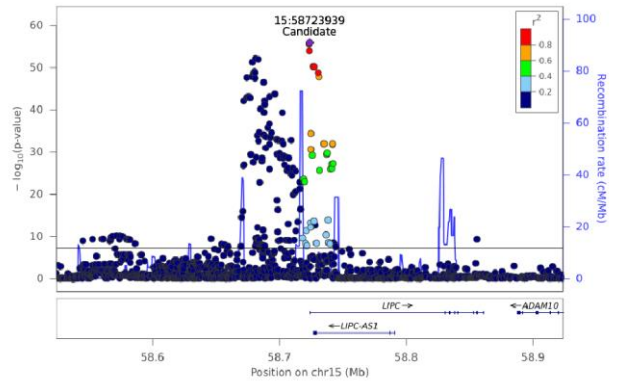

PE(18:0\_20:4) - Chr 15 (58524080-58923790)

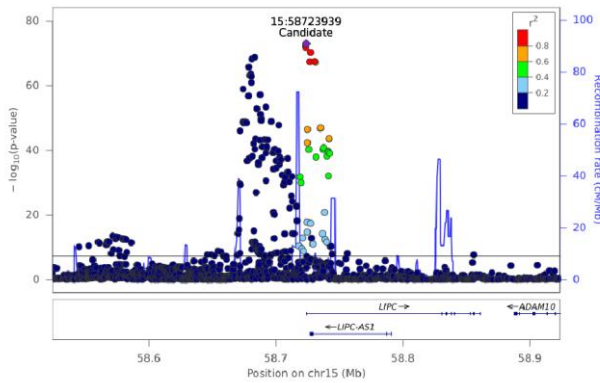

Posterior probabilities

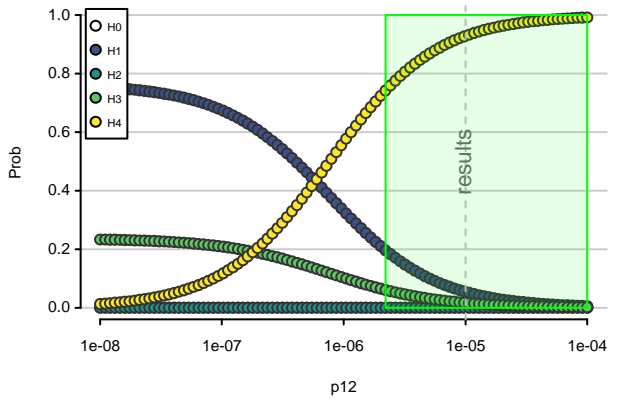

CAD - Chr 15 (58532076-58930416)

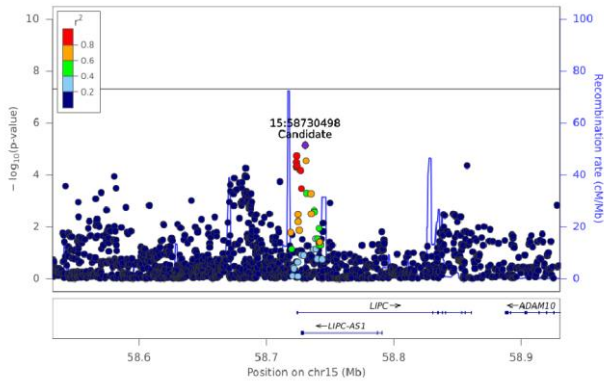

PC(P-16:0/16:1) - Chr 15 (58532076-58930416)

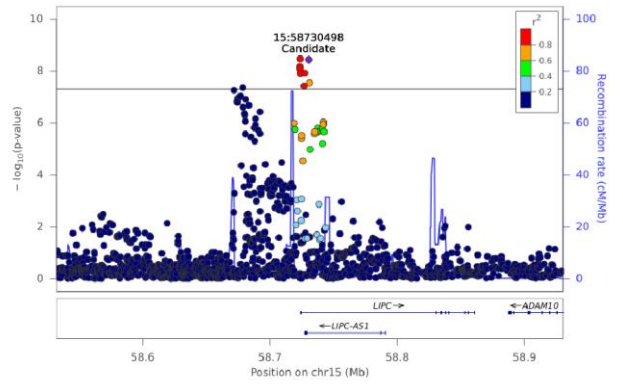

Total PC - Chr 15 (58532076-58930416)

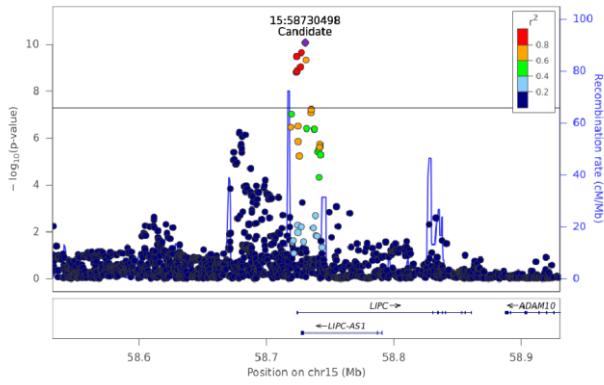

PC(18:1\_18:1) - Chr 15 (58532076-58930416)

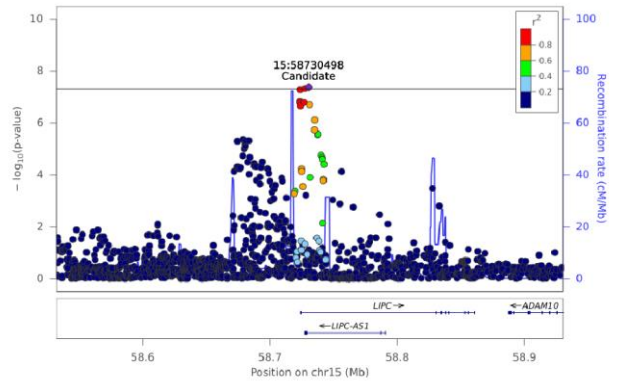

PC(16:0\_18:1) - Chr 15 (58532076-58930416)

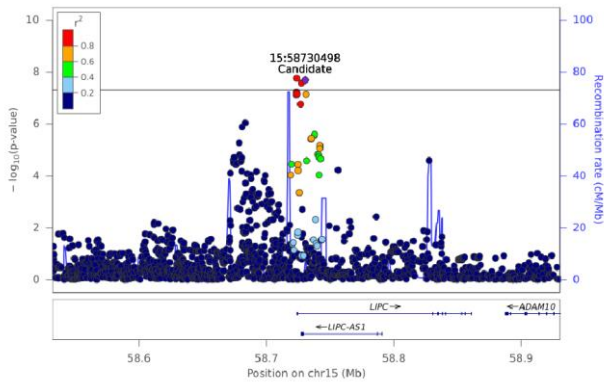

Posterior probabilities

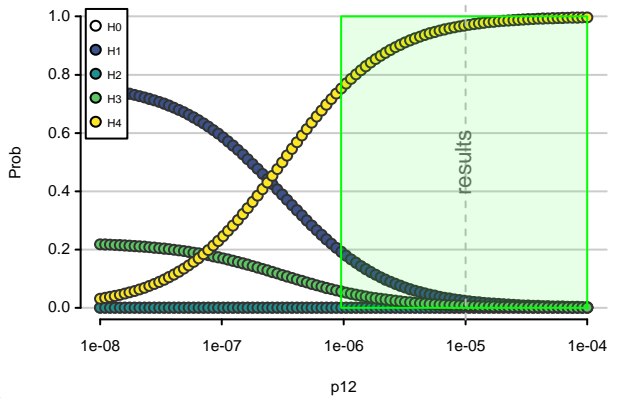

CAD - Chr 15 (58532076-58931039)

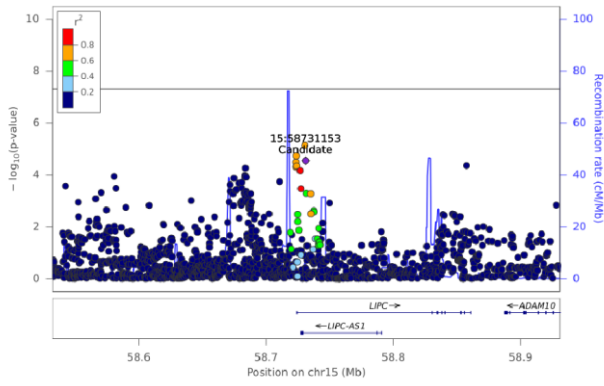

LPE(20:4) [sn2] - Chr 15 (58532076-58931039)

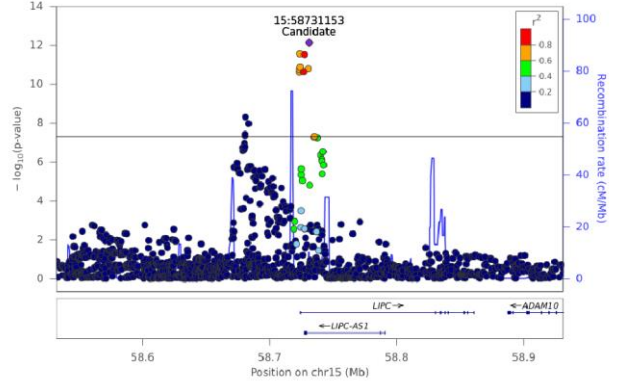

LPE(20:4) [sn1] - Chr 15 (58532076-58931039)

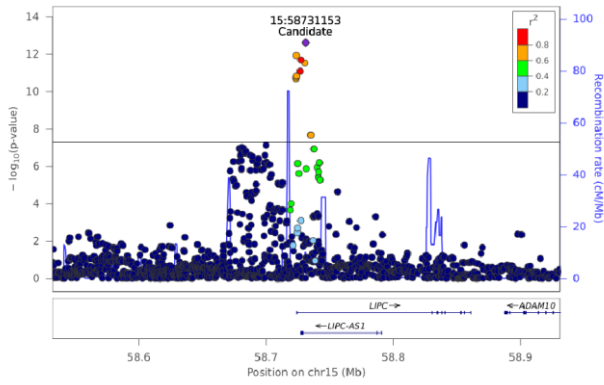

Posterior probabilities

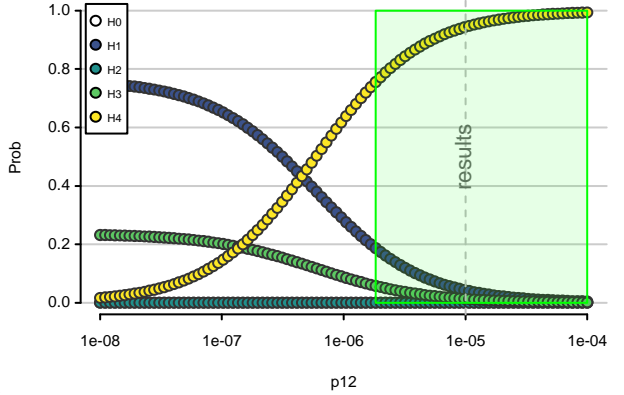

TG(56:6) [NL-20:4] - Chr 15 (58532076-58931039)

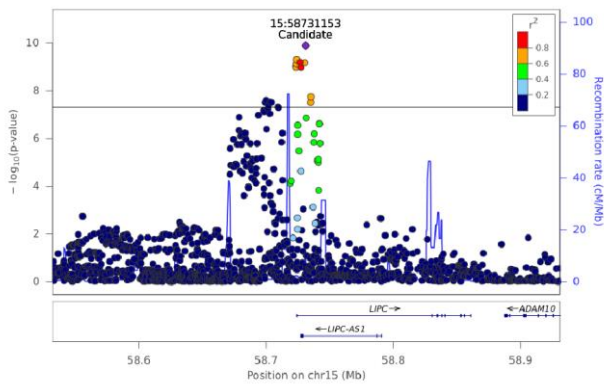



CAD - Chr 16 (56787107-57185761)

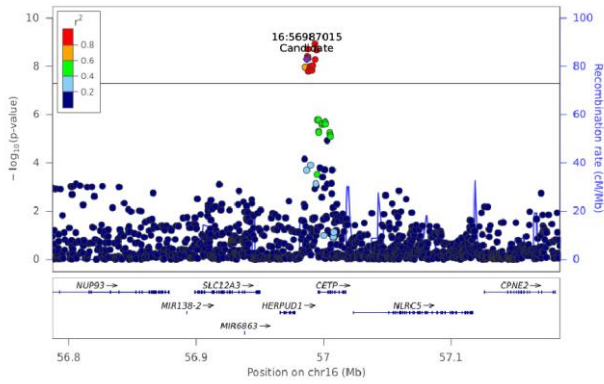

PC(O-18:0/18:2) - Chr 16 (56787107-57185761)

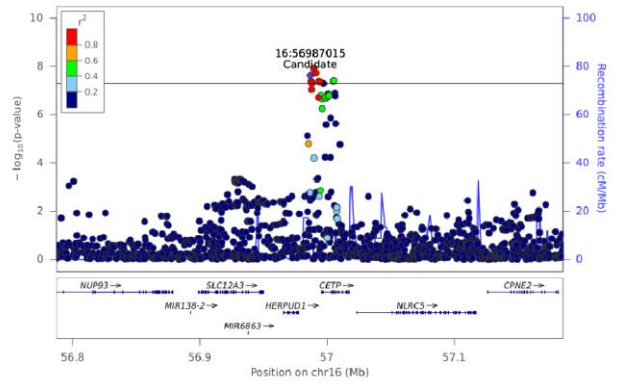

PC(16:0\_16:0) - Chr 16 (56787107-57185761)

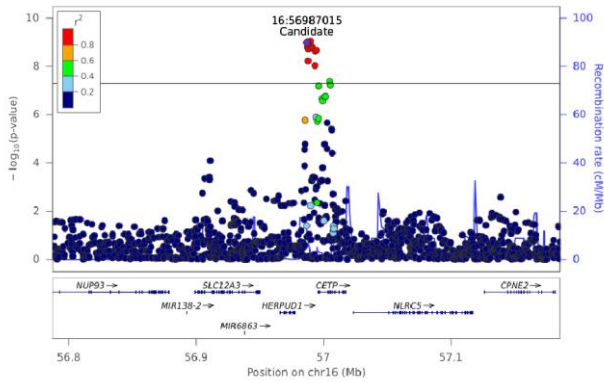

Posterior probabilities

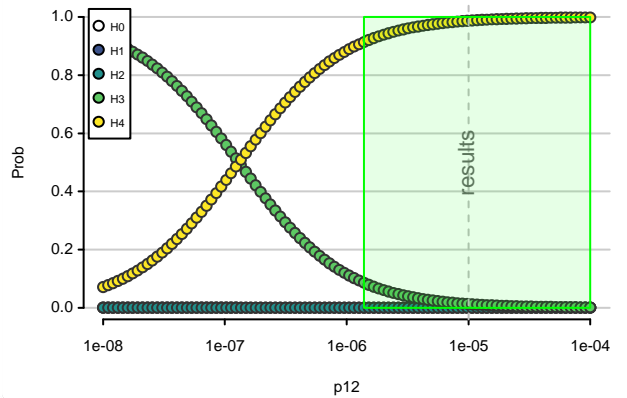

PC(16:0\_18:3) (b) - Chr 16 (56787107-57185761)

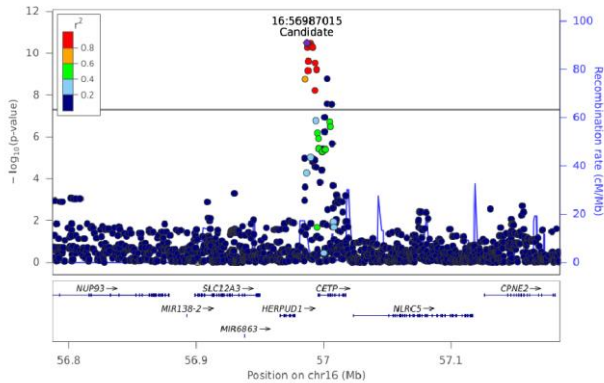

CAD - Chr 16 (56787882-57185761)

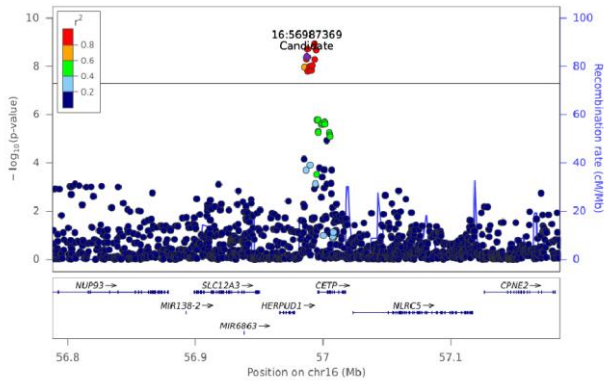

Total PC(O) - Chr 16 (56787882-57185761)

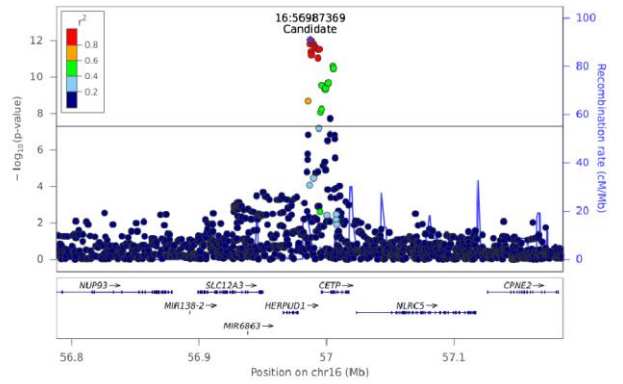

PC(P-16:0/16:1) - Chr 16 (56787882-57185761)

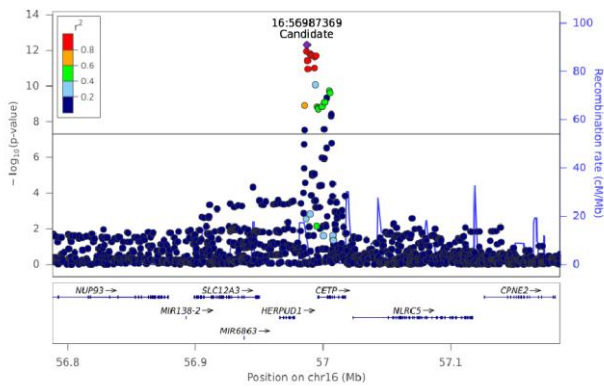

PC(P-16:0/18:1) - Chr 16 (56787882-57185761)

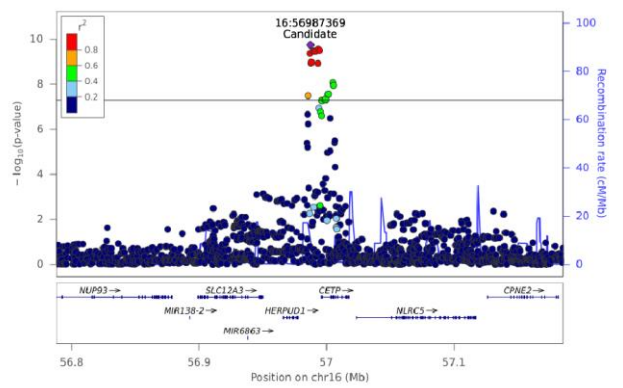

PC(O-32:1) - Chr 16 (56787882-57185761)

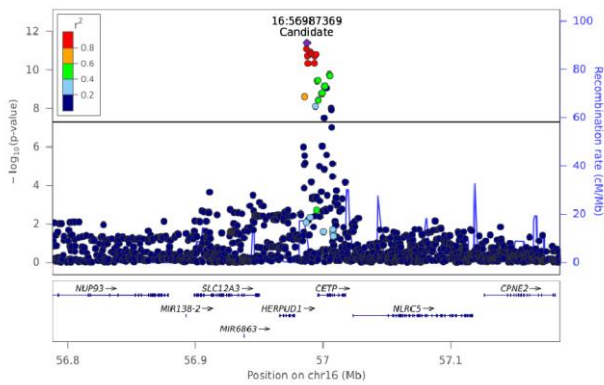

Posterior probabilities

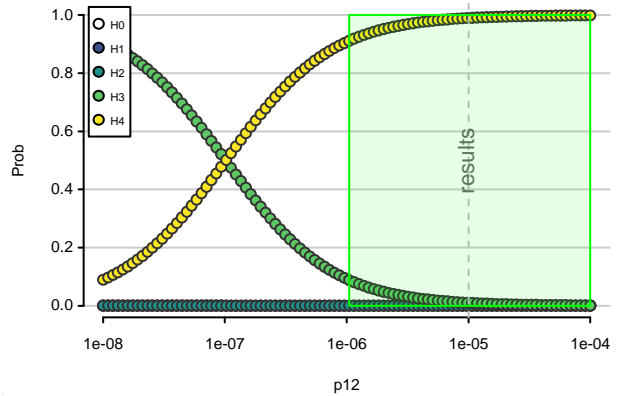

CAD - Chr 16 (56787882-57187761)

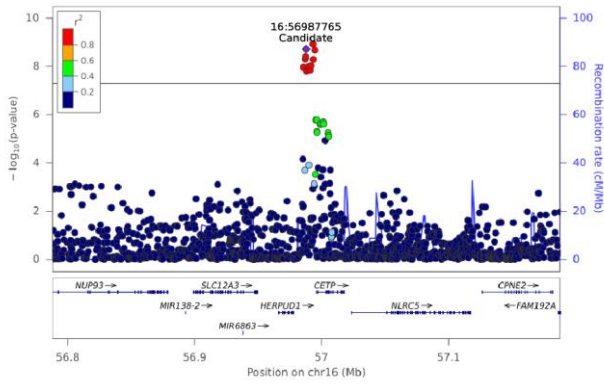

PC(O-38:5) - Chr 16 (56787882-57187761)

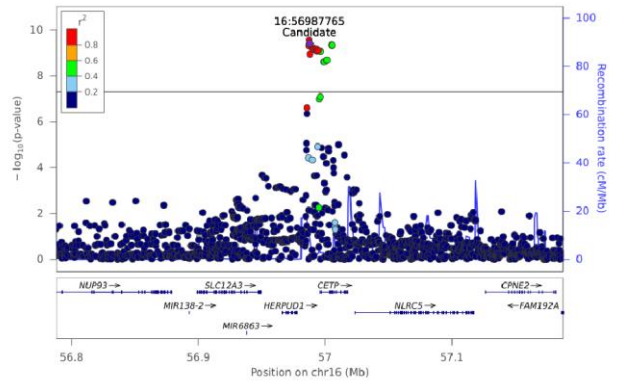

CE(18:0) - Chr 16 (56787882-57187761)

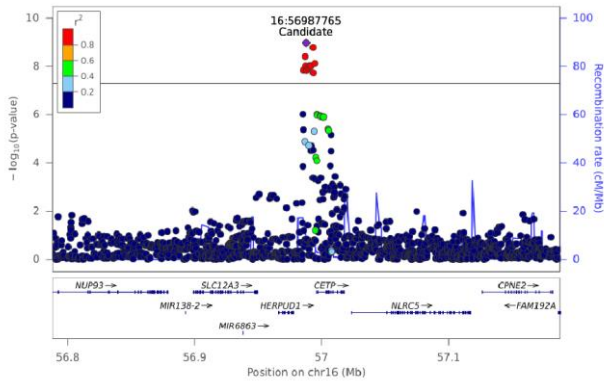

PC(O-16:0/16:0) - Chr 16 (56787882-57187761)

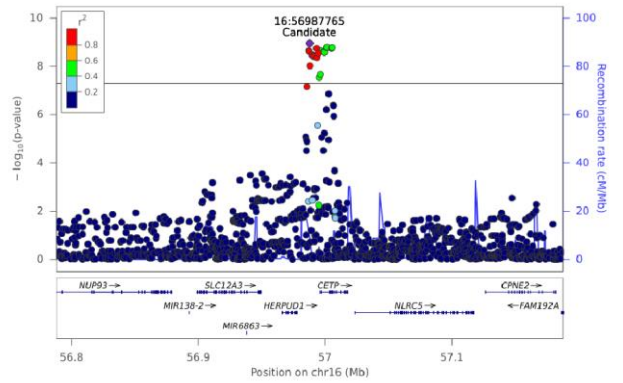

TG(O-52:2) [NL-16:0] - Chr 16 (56787882-57187761)

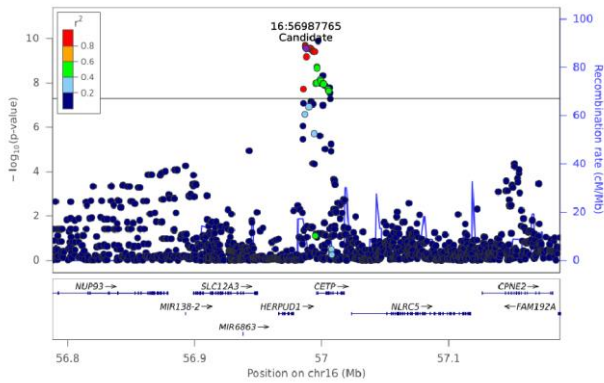

Posterior probabilities

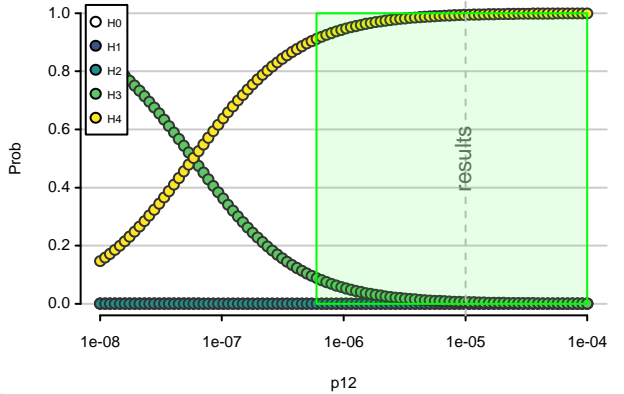



CAD - Chr 16 (56790343-57188778)

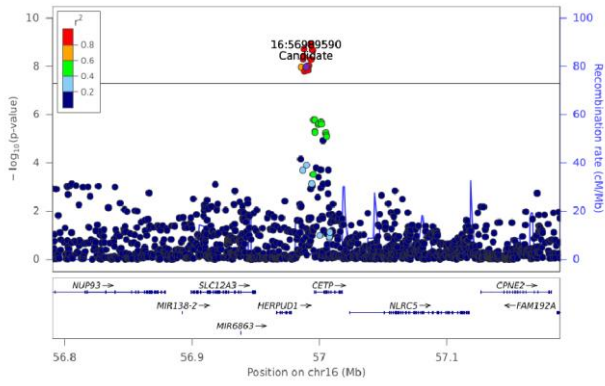

PC(16:0\_18:3) (a) - Chr 16 (56790343-57188778)

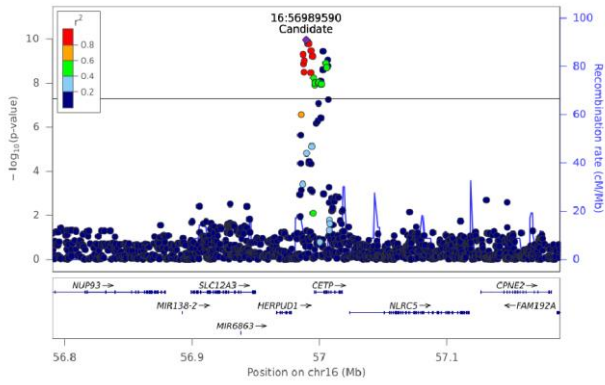

Posterior probabilities

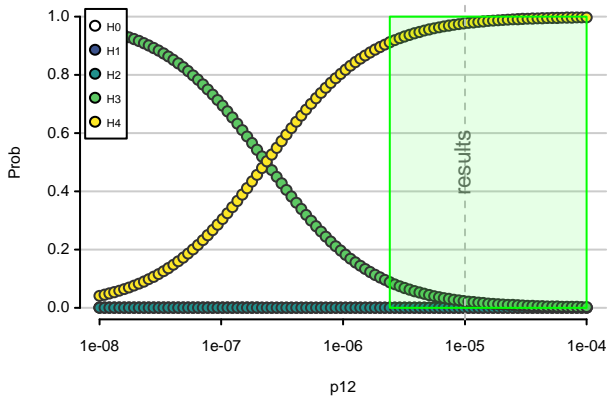

CAD - Chr 16 (56793346-57192310)

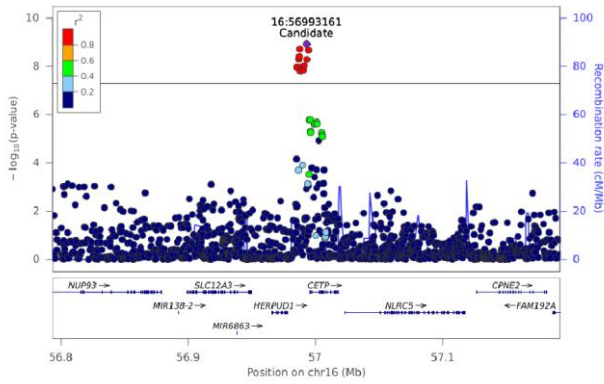

PC(O-38:5) - Chr 16 (56793346-57192310)

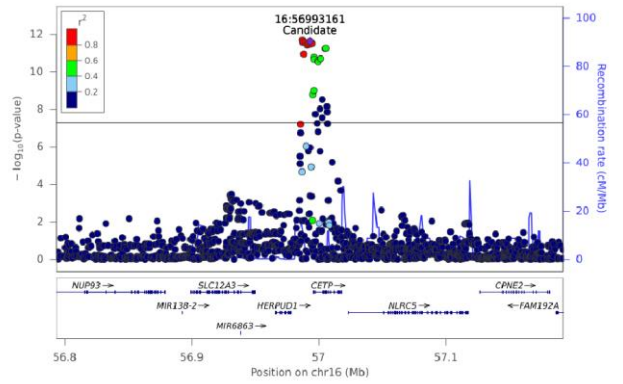

TG(O-50:1) [NL-16:0] - Chr 16 (56793346-57192310)

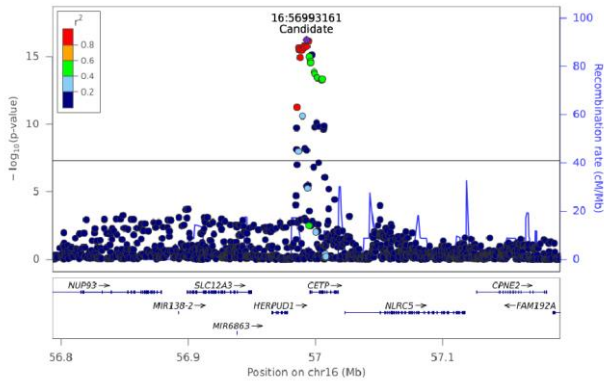

PC(O-40:7) (a) - Chr 16 (56793346-57192310)

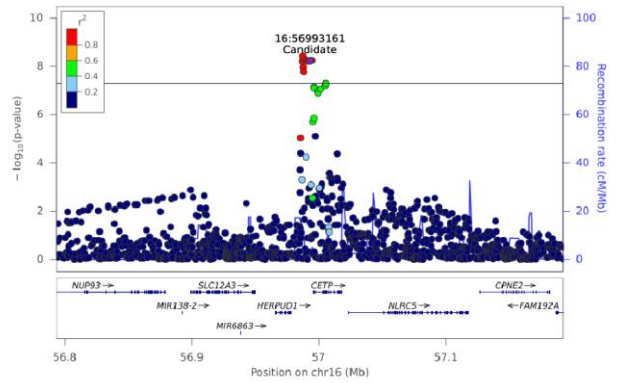

Total TG(O) - Chr 16 (56793346-57192310)

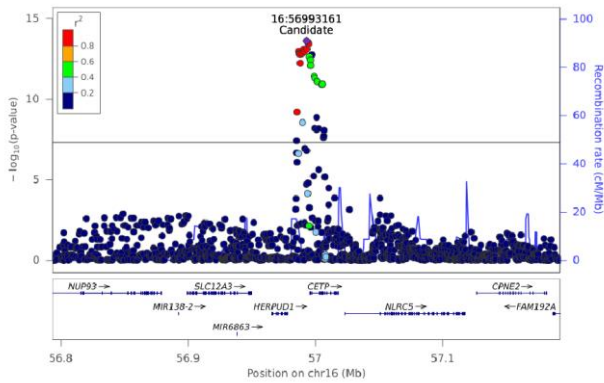

Posterior probabilities

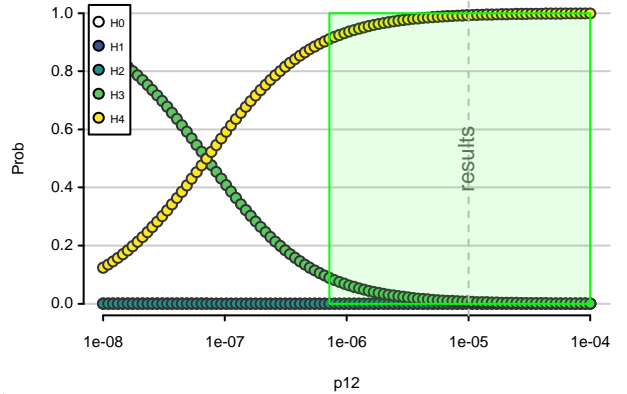

CAD - Chr 16 (56793346-57192310)

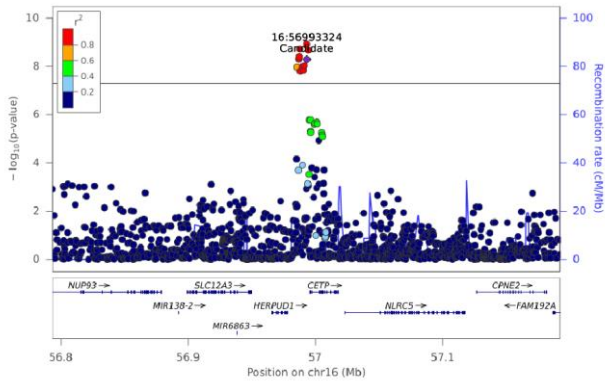

PC(18:2\_18:2) - Chr 16 (56793346-57192310)

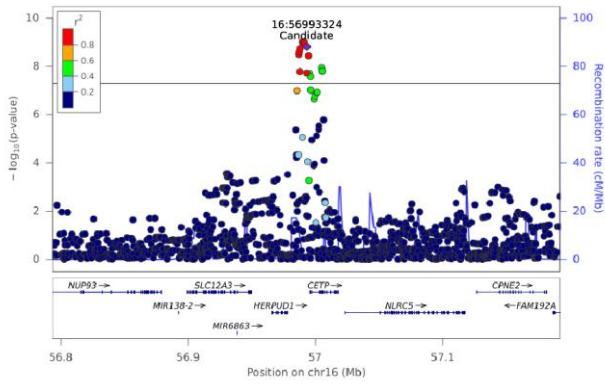

Posterior probabilities

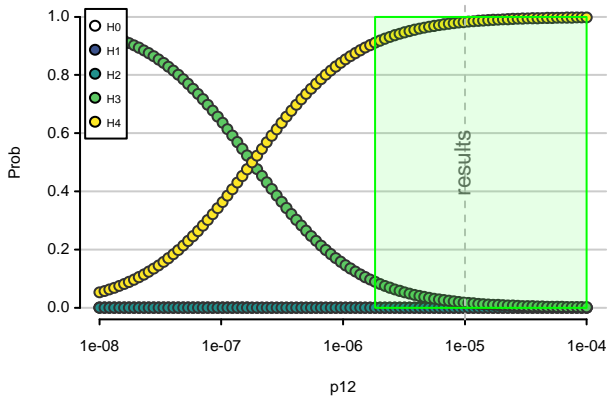

CAD - Chr 16 (56794590-57193448)

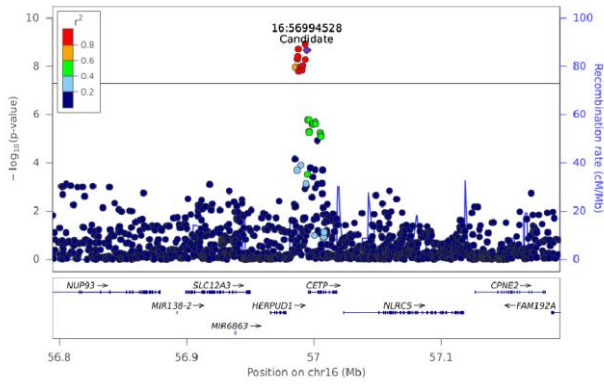

PC(O-36:0) - Chr 16 (56794590-57193448)

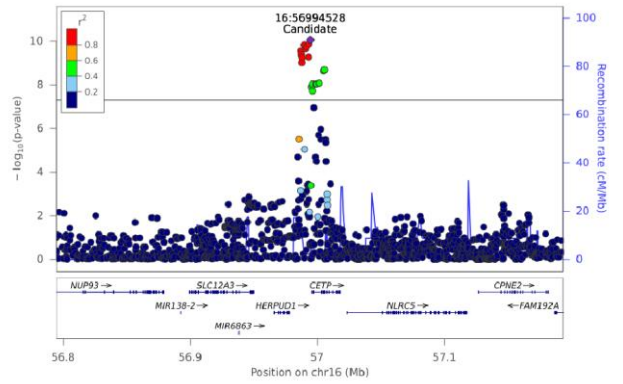

TG(O-50:1) [NL-16:0] - Chr 16 (56794590-57193448)

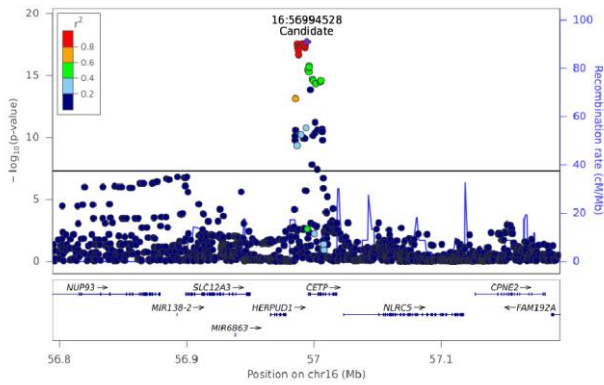

PC(O-34:1) - Chr 16 (56794590-57193448)

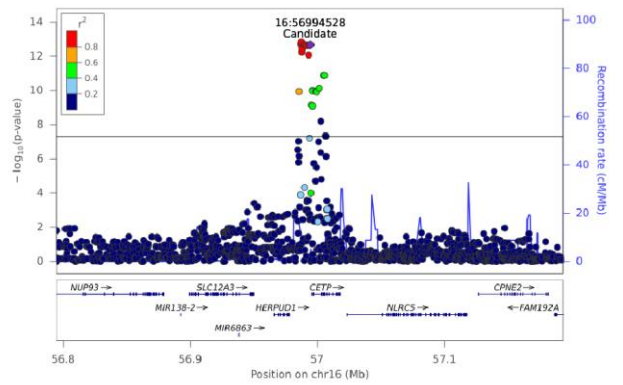

Total TG(O) - Chr 16 (56794590-57193448)

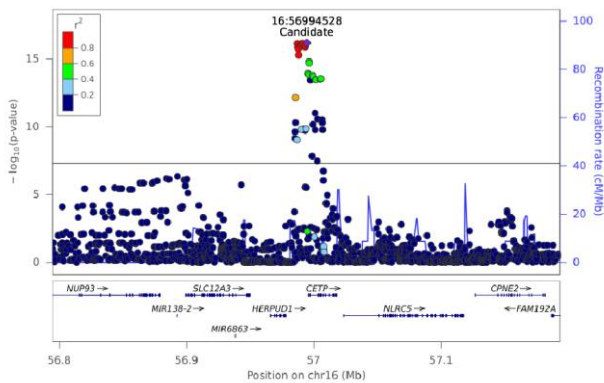

Posterior probabilities

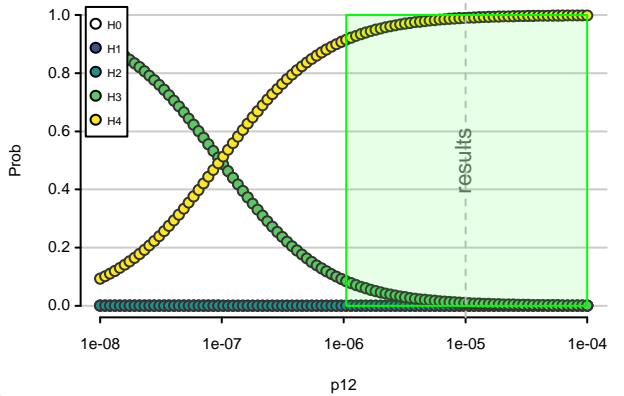

CAD - Chr 19 (10988818-11388151)

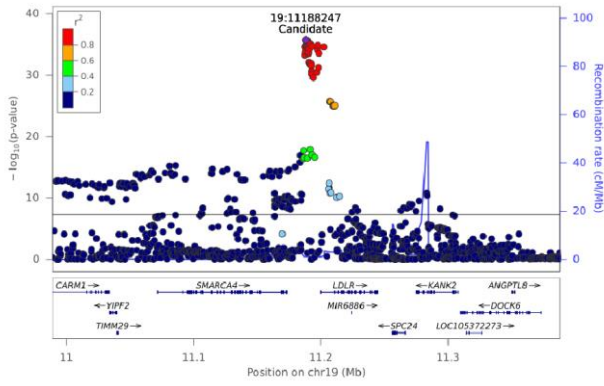

COH - Chr 19 (10988818-11388151)

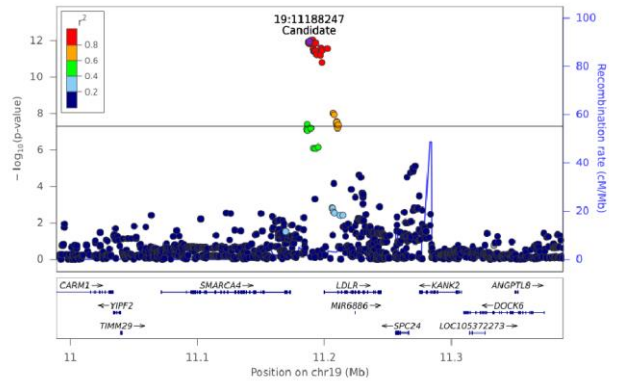

Total SM - Chr 19 (10988818-11388151)

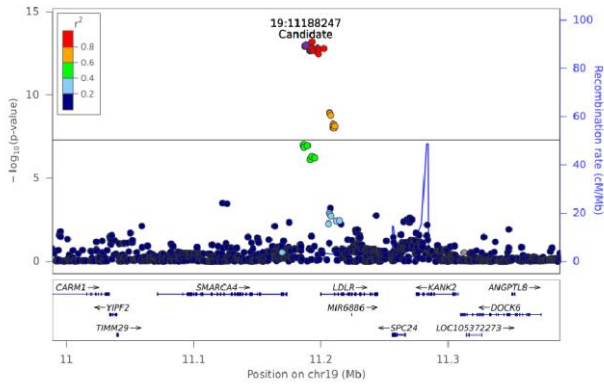

Total COH - Chr 19 (10988818-11388151)

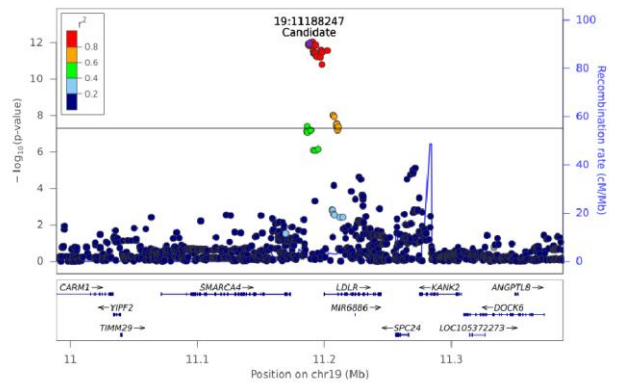

SM(d18:1/16:0) - Chr 19 (10988818-11388151)

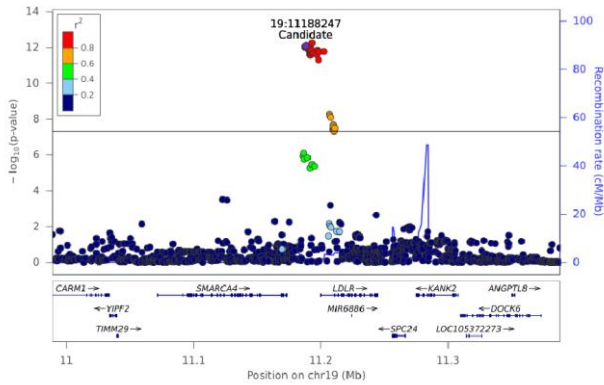

Posterior probabilities

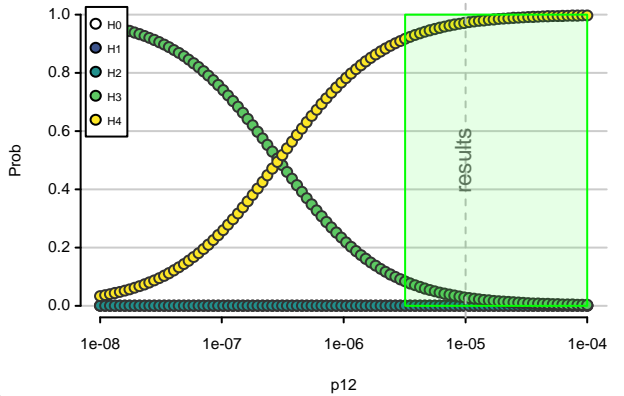

### CAD - Chr 19 (19166890-19566255)

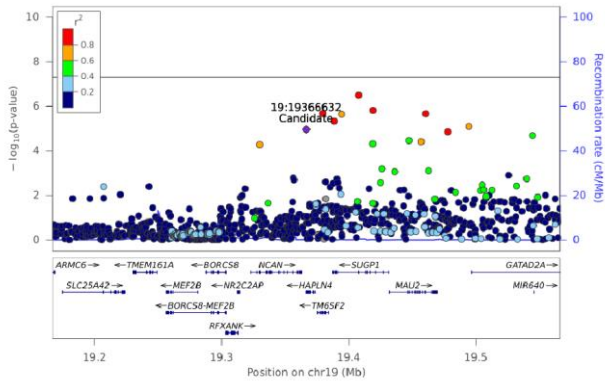

### Cer(d16:1/24:1) - Chr 19 (19166890-19566255)

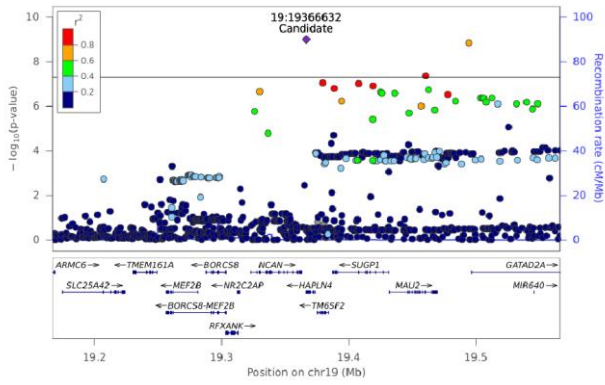

### Posterior probabilities

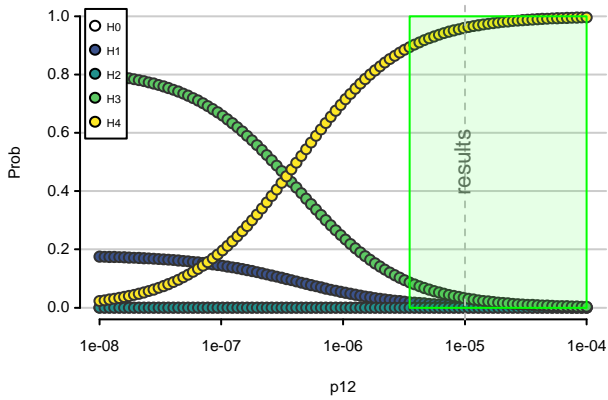



CAD - Chr 19 (19179819-19579046)

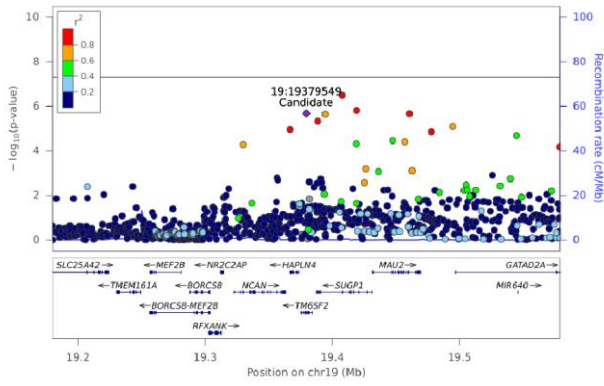

Posterior probabilities

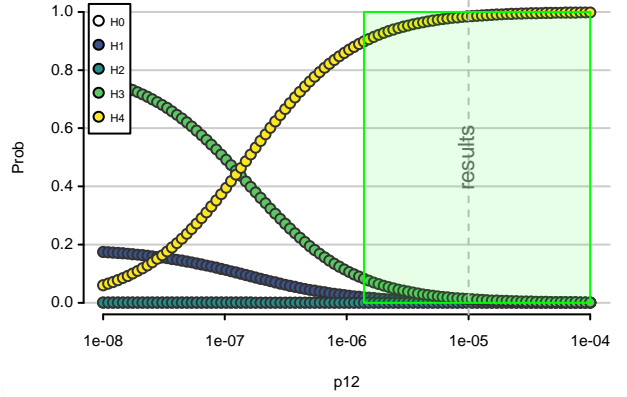

LPC(20:3) [sn1] - Chr 19 (19179819-19579046)

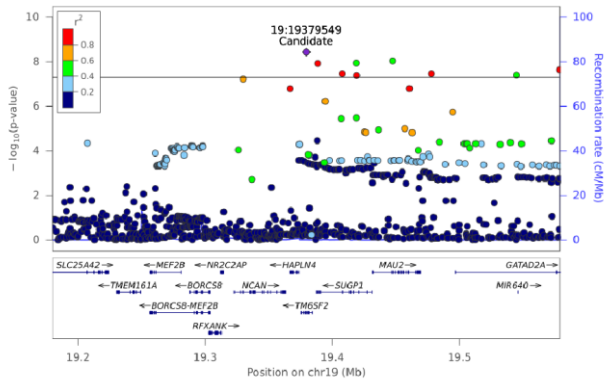

PC(18:1\_20:3) - Chr 19 (19179819-19579046)

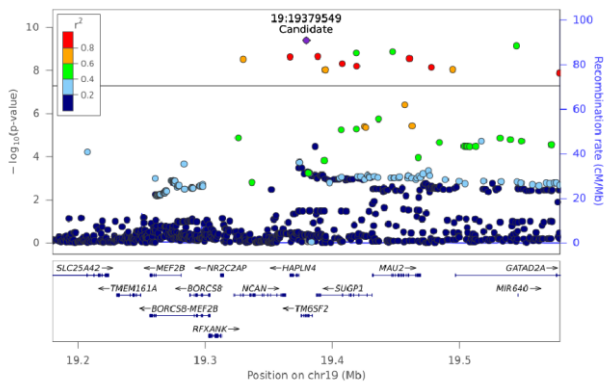

CAD - Chr 19 (19208076-19607564)

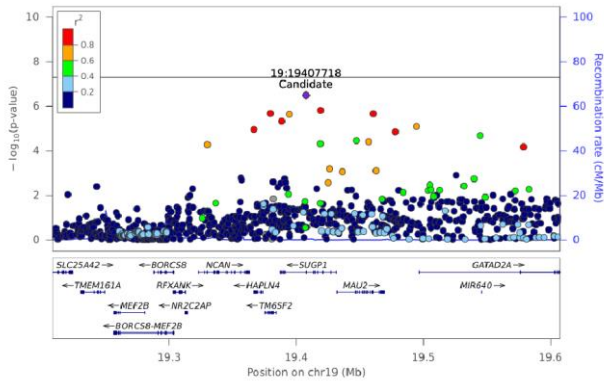

PC(40:7) (a) - Chr 19 (19208076-19607564)

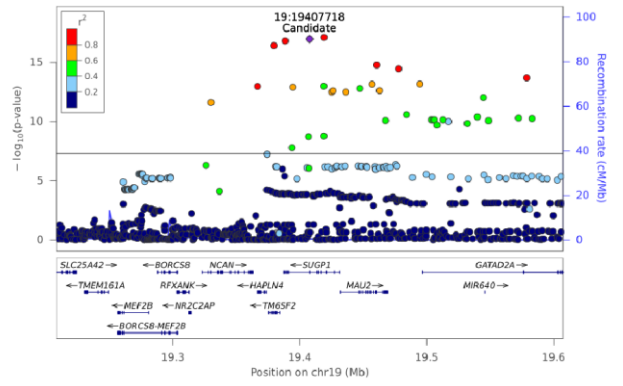

DG(18:1\_20:4) - Chr 19 (19208076-19607564)

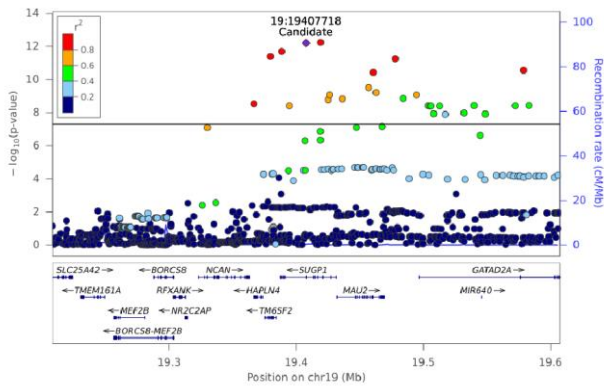

PC(14:0\_20:4) - Chr 19 (19208076-19607564)

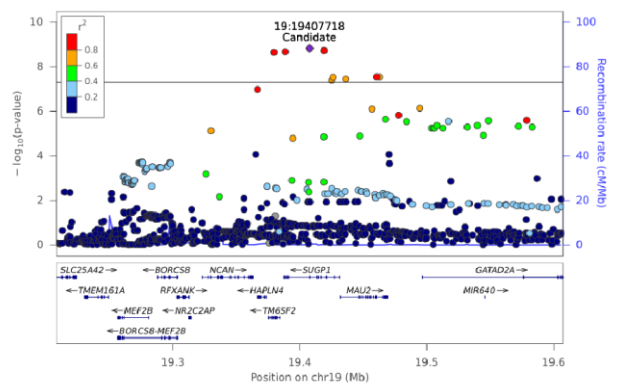

DG(18:2\_20:4) - Chr 19 (19208076-19607564)

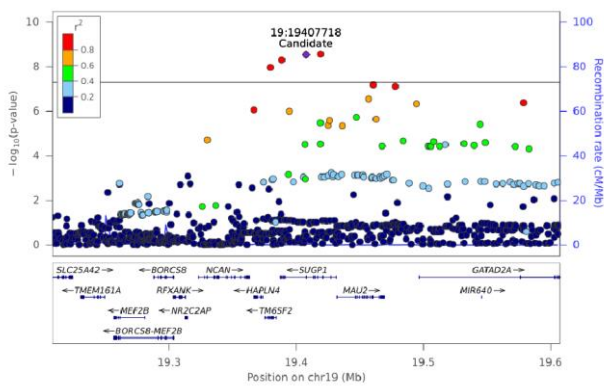

Posterior probabilities

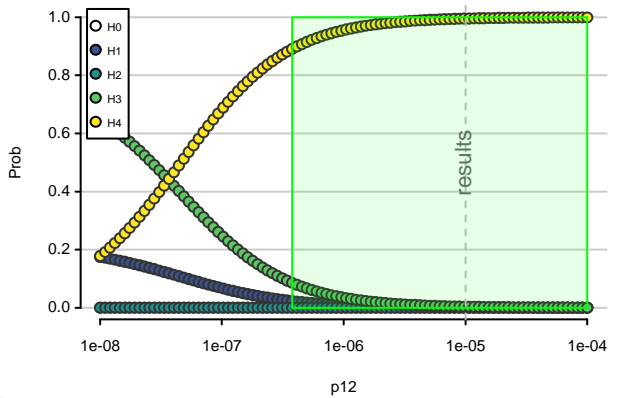



CAD - Chr 19 (19260686-19660523)

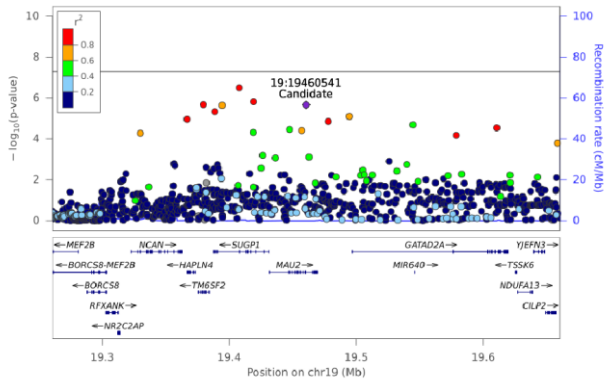

TG(50:3) [NL-16:1] - Chr 19 (19260686-19660523)

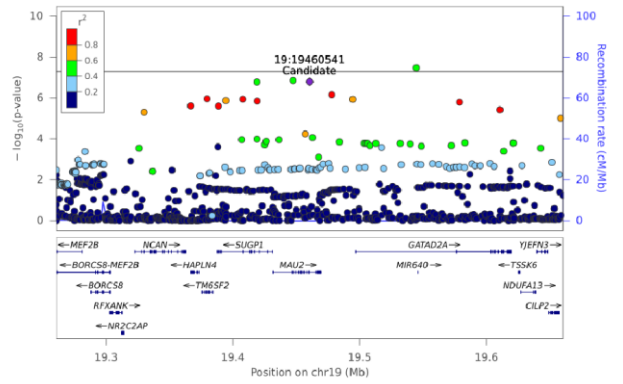

Cer(d18:1/24:0) - Chr 19 (19260686-19660523)

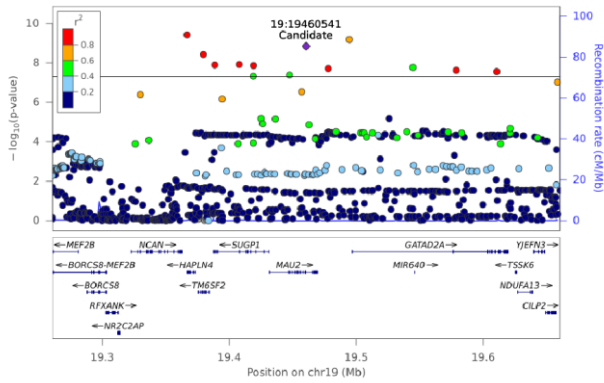

Posterior probabilities

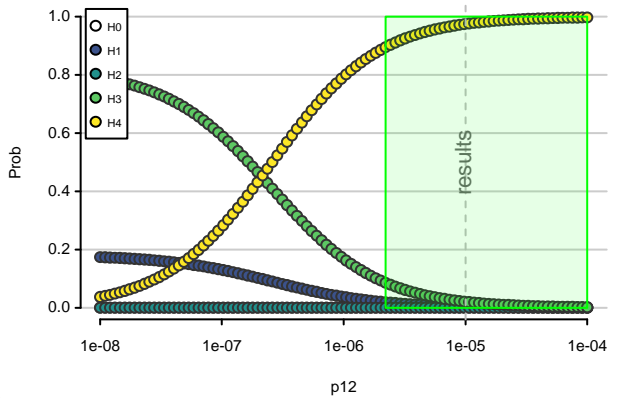

TG(50:2) [NL-18:1] - Chr 19 (19260686-19660523)

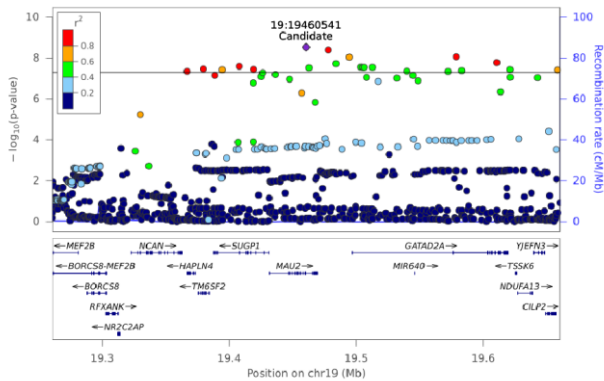

CAD - Chr 19 (19295556-19693426)

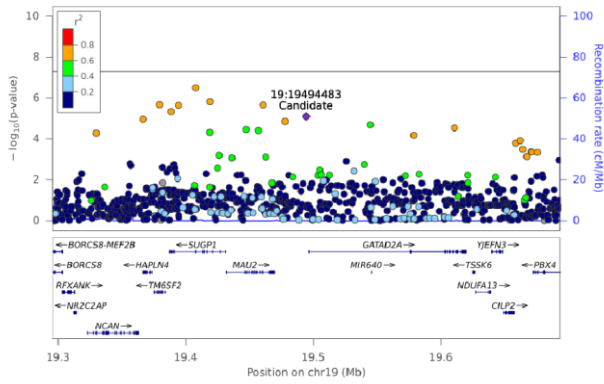

Cer(d17:1/24:1) - Chr 19 (19295556-19693426)

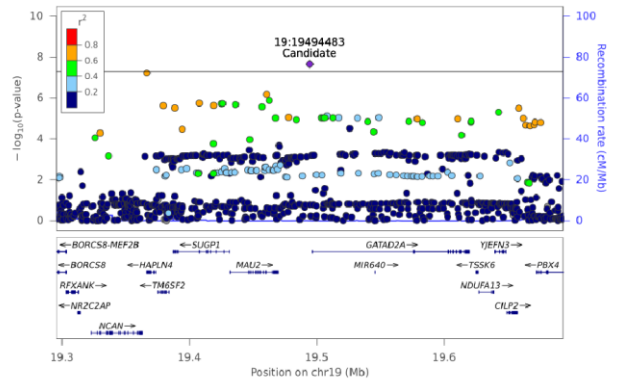

Total Cer - Chr 19 (19295556-19693426)

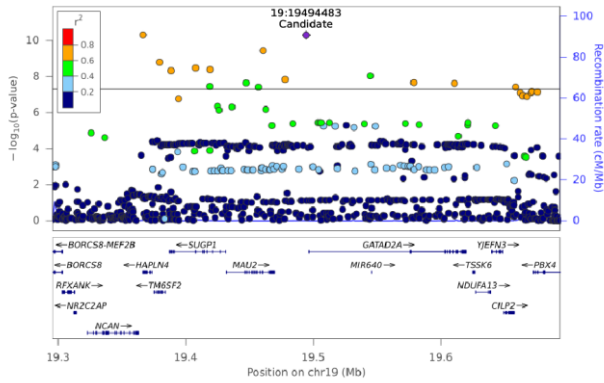

Posterior probabilities

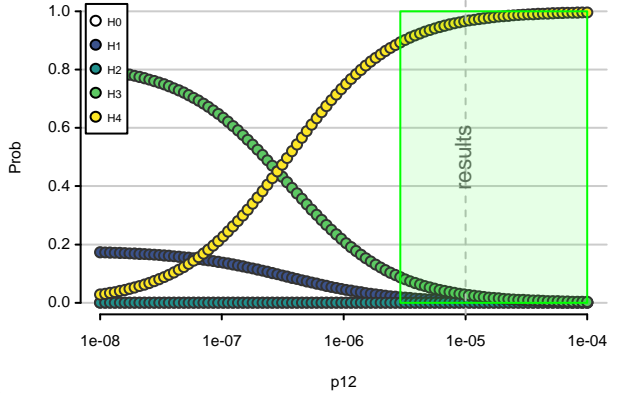

Cer(d18:1/24:1) - Chr 19 (19295556-19693426)

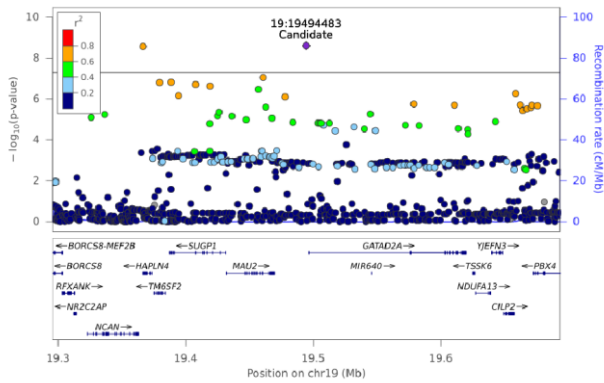

CAD - Chr 19 (45212381-45610846)

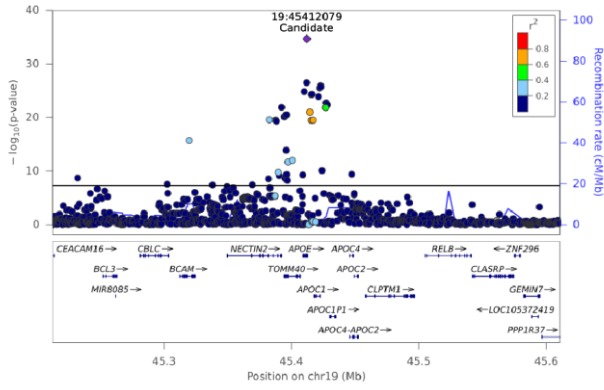

Total CE - Chr 19 (45212381-45610846)

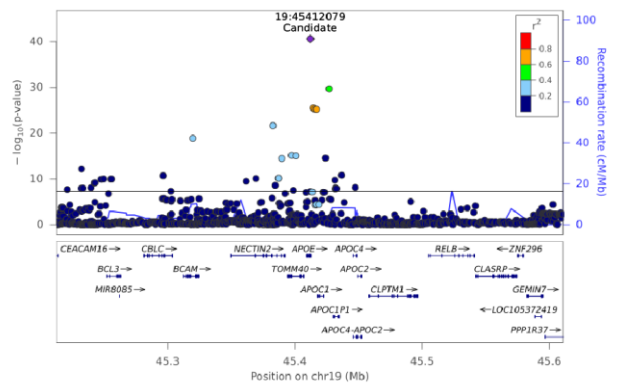

CE(16:0) - Chr 19 (45212381-45610846)

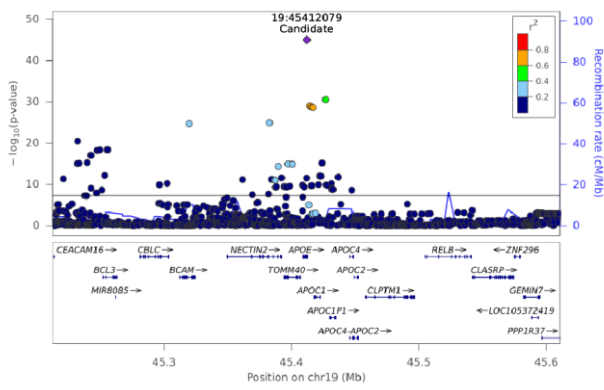

CE(18:1) - Chr 19 (45212381-45610846)

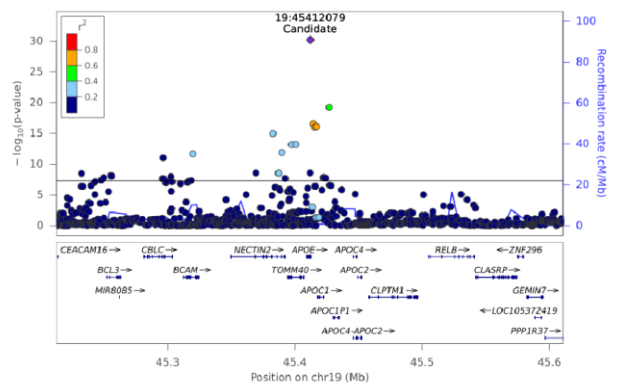

CE(18:2) - Chr 19 (45212381-45610846)

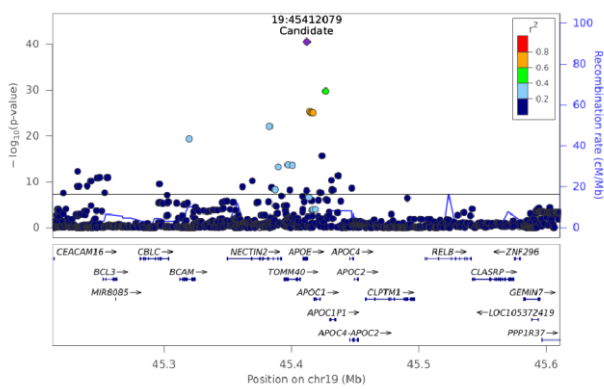

Posterior probabilities

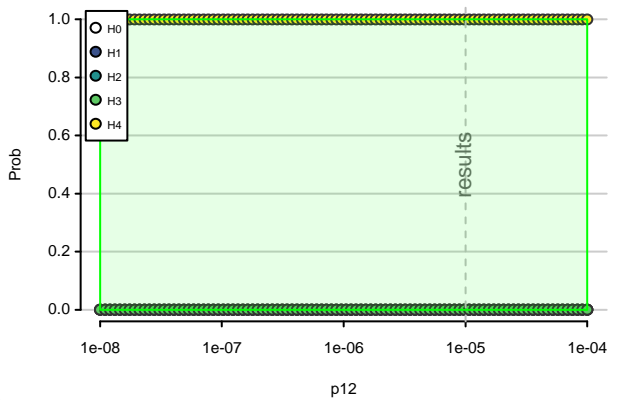

**Supplementary Note 3: Comparison of estimated lipidomic effect sizes.** To assess the impact of adjusted for clinical lipid traits or to assess the difference between adjusted and mtCOJO GWAS results, we calculated t-statistics for the difference in beta-coefficients.

$$t = \frac{\beta_{STD} - \beta_{ADJ}}{\sqrt{SE(\beta_{STD})^2 + SE(\beta_{ADJ})^2}}$$

Where  $\beta_{ADJ}$  and  $\beta_{STD}$  are the estimated genetic effects from models with and without adjustment for clinical lipid traits, respectively.  $SE(\beta)$  is the estimated standard error of the estimates.

## Supplementary References

1. Burkhardt, R. *et al.* Integration of Genome-Wide SNP Data and Gene-Expression Profiles Reveals Six Novel Loci and Regulatory Mechanisms for Amino Acids and Acylcarnitines in Whole Blood. *PLoS Genet* **11**, e1005510 (2015).
2. Chai, J.F. *et al.* Associations with metabolites in Chinese suggest new metabolic roles in Alzheimer's and Parkinson's diseases. *Hum Mol Genet* **29**, 189-201 (2020).
3. Chasman, D.I. *et al.* Forty-three loci associated with plasma lipoprotein size, concentration, and cholesterol content in genome-wide analysis. *PLoS Genet* **5**, e1000730 (2009).
4. Davis, J.P. *et al.* Common, low-frequency, and rare genetic variants associated with lipoprotein subclasses and triglyceride measures in Finnish men from the METSIM study. *PLoS Genet* **13**, e1007079 (2017).
5. Demirkan, A. *et al.* Genome-wide association study identifies novel loci associated with circulating phospho- and sphingolipid concentrations. *PLoS Genet* **8**, e1002490 (2012).
6. Draisma, H.H.M. *et al.* Genome-wide association study identifies novel genetic variants contributing to variation in blood metabolite levels. *Nat Commun* **6**, 7208 (2015).
7. Feofanova, E.V. *et al.* Sequence-Based Analysis of Lipid-Related Metabolites in a Multiethnic Study. *Genetics* **209**, 607-616 (2018).
8. Gieger, C. *et al.* Genetics meets metabolomics: a genome-wide association study of metabolite profiles in human serum. *PLoS Genet* **4**, e1000282 (2008).
9. Harshfield, E.L. *et al.* Genome-wide analysis of blood lipid metabolites in over 5,000 South Asians reveals biological insights at cardiometabolic disease loci. *medRxiv*, 2020.10.16.20213520 (2020).
10. Hartiala, J.A. *et al.* Genome-wide association study and targeted metabolomics identifies sex-specific association of CPS1 with coronary artery disease. *Nat Commun* **7**, 10558 (2016).
11. Hicks, A.A. *et al.* Genetic determinants of circulating sphingolipid concentrations in European populations. *PLoS Genet* **5**, e1000672 (2009).
12. Hong, M.G. *et al.* A genome-wide assessment of variability in human serum metabolism. *Hum Mutat* **34**, 515-24 (2013).
13. Hu, Y. *et al.* Discovery and fine-mapping of loci associated with MUFAs through trans-ethnic meta-analysis in Chinese and European populations. *J Lipid Res* **58**, 974-981 (2017).
14. Illig, T. *et al.* A genome-wide perspective of genetic variation in human metabolism. *Nat Genet* **42**, 137-41 (2010).
15. Inouye, M. *et al.* Novel Loci for metabolic networks and multi-tissue expression studies reveal genes for atherosclerosis. *PLoS Genet* **8**, e1002907 (2012).
16. Kalsbeek, A. *et al.* A genome-wide association study of red-blood cell fatty acids and ratios incorporating dietary covariates: Framingham Heart Study Offspring Cohort. *PLoS One* **13**, e0194882 (2018).
17. Kettunen, J. *et al.* Genome-wide association study identifies multiple loci influencing human serum metabolite levels. *Nat Genet* **44**, 269-76 (2012).
18. Kettunen, J. *et al.* Genome-wide study for circulating metabolites identifies 62 loci and reveals novel systemic effects of LPA. *Nat Commun* **7**, 11122 (2016).
19. Krumsiek, J. *et al.* Mining the unknown: a systems approach to metabolite identification combining genetic and metabolic information. *PLoS Genet* **8**, e1003005 (2012).
20. Long, T. *et al.* Whole-genome sequencing identifies common-to-rare variants associated with human blood metabolites. *Nat Genet* **49**, 568-578 (2017).
21. Lotta, L.A. *et al.* Genetic Predisposition to an Impaired Metabolism of the Branched-Chain Amino Acids and Risk of Type 2 Diabetes: A Mendelian Randomisation Analysis. *PLoS Med* **13**, e1002179 (2016).
22. Lotta, L.A. *et al.* A cross-platform approach identifies genetic regulators of human metabolism and health. *Nat Genet* **53**, 54-64 (2021).

23. Mittelstrass, K. *et al.* Discovery of sexual dimorphisms in metabolic and genetic biomarkers. *PLoS Genet* **7**, e1002215 (2011).
24. Nicholson, G. *et al.* A genome-wide metabolic QTL analysis in Europeans implicates two loci shaped by recent positive selection. *PLoS Genet* **7**, e1002270 (2011).
25. Raffler, J. *et al.* Genome-Wide Association Study with Targeted and Non-targeted NMR Metabolomics Identifies 15 Novel Loci of Urinary Human Metabolic Individuality. *PLoS Genet* **11**, e1005487 (2015).
26. Rhee, E.P. *et al.* A genome-wide association study of the human metabolome in a community-based cohort. *Cell Metab* **18**, 130-43 (2013).
27. Shin, S.Y. *et al.* An atlas of genetic influences on human blood metabolites. *Nat Genet* **46**, 543-550 (2014).
28. Arnold, M., Raffler, J., Pfeufer, A., Suhre, K. & Kastenmüller, G. SNIIPA: an interactive, genetic variant-centered annotation browser. *Bioinformatics* **31**, 1334-6 (2015).
29. Suhre, K. *et al.* Human metabolic individuality in biomedical and pharmaceutical research. *Nature* **477**, 54-60 (2011).
30. Tabassum, R. *et al.* Genetic architecture of human plasma lipidome and its link to cardiovascular disease. *Nat Commun* **10**, 4329 (2019).
31. Teslovich, T.M. *et al.* Identification of seven novel loci associated with amino acid levels using single-variant and gene-based tests in 8545 Finnish men from the METSIM study. *Hum Mol Genet* **27**, 1664-1674 (2018).
32. Tukiainen, T. *et al.* Detailed metabolic and genetic characterization reveals new associations for 30 known lipid loci. *Hum Mol Genet* **21**, 1444-55 (2012).
33. Xie, W. *et al.* Genetic variants associated with glycine metabolism and their role in insulin sensitivity and type 2 diabetes. *Diabetes* **62**, 2141-50 (2013).
34. Yet, I. *et al.* Genetic Influences on Metabolite Levels: A Comparison across Metabolomic Platforms. *PLoS One* **11**, e0153672 (2016).
35. Yu, B. *et al.* Whole genome sequence analysis of serum amino acid levels. *Genome Biol* **17**, 237 (2016).
36. van der Harst, P. & Verweij, N. Identification of 64 Novel Genetic Loci Provides an Expanded View on the Genetic Architecture of Coronary Artery Disease. *Circ Res* **122**, 433-443 (2018).
